# Supplementary material for: Cu–Al mixed oxide catalysts for azide–alkyne 1,3-cycloaddition in ethanol–water
Source: Royal Society of Chemistry journal article supplement (doi:10.1039/c6ra10097j), 2016-01-01
Supplement: c6ra10097j1.pdf [file c6ra10097j1.pdf]

## Supporting Information

### **Cu-Al mixed oxides catalysts for the azide-alkyne 1,3-cycloaddition in ethanol-water**

R. González-Olvera,<sup>a</sup> C. I. Urquiza-Castro,<sup>b</sup> G. E. Negrón-Silva,<sup>a\*</sup> D. Angeles-Beltrán,<sup>a</sup> L. Lomas-Romero,<sup>b\*</sup> A. Gutiérrez-Carrillo,<sup>b</sup> V. H. Lara,<sup>b</sup> Rosa Santillan,<sup>c</sup> J. A. Morales-Serna.<sup>b</sup>

<sup>a</sup>*Departamento de Ciencias Básicas, Universidad Autónoma Metropolitana Azcapotzalco, Av. San Pablo No. 180, Ciudad de México, C.P. 02200, México. Fax: +52 55 53189000 (ext. 2169); Tel: +52 55 5318 9593; E-mail: gns@correo.azc.uam.mx (GENS)*

<sup>b</sup>*Departamento de Química, Universidad Autónoma Metropolitana Iztapalapa, Av. San Rafael Atlixco No.186, Ciudad de México, C.P. 09340, México. Fax: +52 55 58044666; Tel: +52 55 58044913; E-mail: llr@xanum.uam.mx (LLR)*

<sup>c</sup>*Departamento de Química, Centro de Investigación y de Estudios Avanzados del Instituto Politécnico Nacional, Apartado Postal Apartado Postal 14-740, Ciudad de México 07000, México.*

#### Table of Contents

|                                                                       |     |
|-----------------------------------------------------------------------|-----|
| 1. General methods                                                    | S1  |
| 2. Experimental procedures                                            | S1  |
| 3. Characterization data                                              | S7  |
| 4. <sup>1</sup> H and <sup>13</sup> C NMR spectra for 1,2,3-triazoles | S17 |
| 5. References                                                         | S29 |

## 1. General methods

Commercially available reagents and solvents were used as received. Column chromatography was performed on Kiesel gel silica gel 60 (230-400 mesh). Melting points were determined using a Fisher-Johns apparatus and are uncorrected. The NMR spectra were obtained using Bruker Ascend-400 (400 MHz) and Bruker Avance DMX-500 (500 MHz) spectrometers. Chemical shifts ( $\delta$ ) are given in ppm and coupling constants  $J$  are given in hertz (Hz). Mass spectra (MS) were recorded on a GC-MS, Agilent Technologies 6890N, Detector 5973, column HP5-MS 30m x 0.25 mm x 0.25  $\mu$ m, in the chemical ionization mode using methane UAP grade as ionization gas. High-resolution mass spectra (HRMS) were recorded on a JEOL JMS-SX 102a and Agilent-MSD-TOF-1069A spectrometers. Microwave irradiation experiments were performed on a Discover System (CEM Corporation) single-mode microwave using standard sealed microwave glass vials. Simultaneous air jet cooling (3-4 bar) during microwave irradiation was performed by using a compressor. The nitrogen adsorption-desorption isotherm of HDL was obtained at  $-196$  °C on Micromeritics ASAP 2020 equipment. Powder X-ray diffraction (XRD) was performed using a Philips X'Pert Instrument with Cu-K $\alpha$  radiation (45kV, 40 mA). SEM-EDS images and emission spectra were obtained using a Zeiss SUPRA 55 VP microscope with secondary electron and Oxford detector.

## 2. Experimental procedures

### ***Synthesis of Cu-Al layered double hydroxide (LDH)***

LDHs were prepared by dissolving 11.6 g of  $\text{Cu}(\text{NO}_3)_2 \cdot 2.5\text{H}_2\text{O}$  and 9.37 g of  $\text{Al}(\text{NO}_3)_3 \cdot 9\text{H}_2\text{O}$  in 90 mL of deionized  $\text{H}_2\text{O}$  at room temperature. Then, 100 mL of 0.5M  $\text{Na}_2\text{CO}_3$  was added at room temperature. The green gel formed, was heated to 40 °C in a microwave (90W, 250 psi) for 5 minutes. The obtained gel was washed five times with deionized  $\text{H}_2\text{O}$  to pH 7. The material was dried at 120° C for 18 hours.

### ***Preparation of Cu(Al)O mixed oxides***

The calcined material was obtained by heating of as-synthesized LDH at 540°C in a tubular furnace under  $\text{N}_2$  flow for 6 hours. 7 g of a black solid is stable in air, which was characterized by XRD, IR, nitrogen physisorption and scanning electron microscopy was obtained.

**Characterization of Cu-Al layered double hydroxide (LDH) and Cu(Al)O mixed oxides**

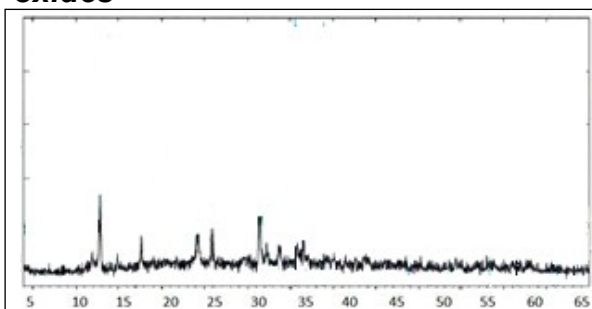

**Figure S1. X-ray diffraction patterns of as-synthesized LDH**

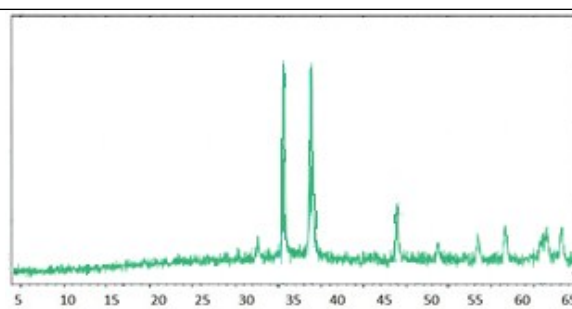

**Figure S2. X-ray diffraction patterns of Cu(Al)O mixed oxide**

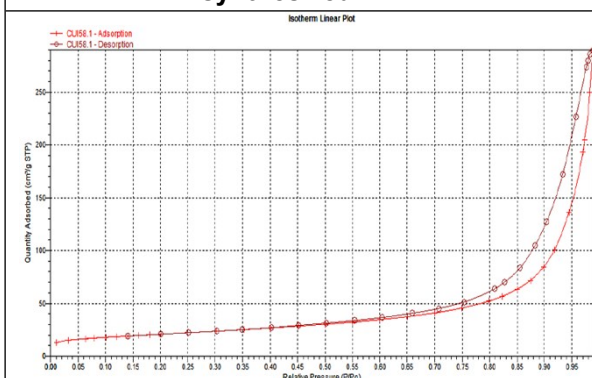

**Figure S3. Nitrogen adsorption-desorption isotherms of as-synthesized LDH**

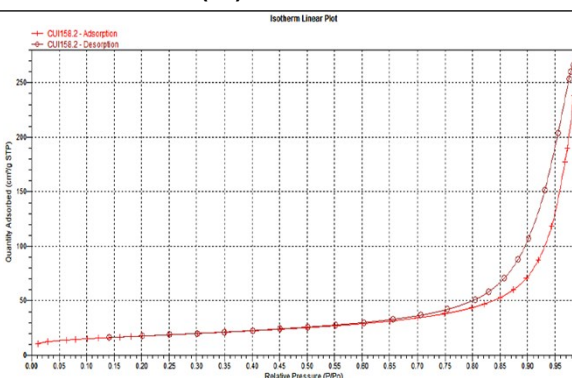

**Figure S4. Nitrogen adsorption-desorption isotherms of Cu(Al)O mixed oxide**

**Table S1. The nitrogen adsorption-desorption analysis parameters of materials**

| Parameters                          | LDH  | Mixed oxide |
|-------------------------------------|------|-------------|
| $S_{BET}$ ( $m^2 \cdot g^{-1}$ )    | 74   | 63          |
| Pore volume ( $cm^3 \cdot g^{-1}$ ) | 0.44 | 0.42        |
| Pore size (Å)                       | 161  | 174         |

**Table S2. Composition of materials**

| Element | Weight% LDH | Weight% Mixed oxide |
|---------|-------------|---------------------|
| O       | 50.28       | 49.32               |
| Al      | 11.79       | 12.39               |
| Si      | 0.45        | 0.35                |
| Cu      | 37.48       | 37.94               |
| Total   | 100.00      | 100.00              |

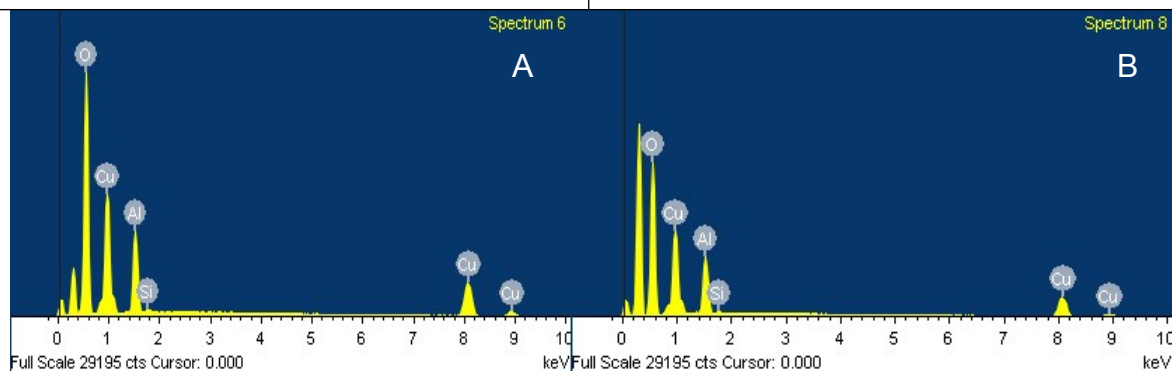

**Figure S5. SEM-EDX spectra of (A) as-synthesized LDH and (B) Cu(Al)O mixed oxide**

The as-synthesized LDH exhibited Cu–Al reflections associated with the layered double hydroxide crystal structure. The maxima correspond to typical diffraction by planes (1 1 0), (0 0 2), (1 1 1), (1 1 2), (0 2 0), (1 0 1) and (1 1 3) (Figure S1). These planes are similar to those shown by malachite [Cu<sub>2</sub>CO<sub>3</sub>(OH)<sub>2</sub>] because of the presence of Cu in the material. Calcining the material yields a Cu(Al)O mixed oxide with a periclase-like structure with (110), (111), (202), (022), (113), (311) and (220) plane reflections, which are typical of CuO (Figure S2). The nitrogen adsorption-desorption isotherm of as-synthesized LDH (Figure S3) and the Cu(Al)O mixed oxide (Figure S4) showed a profile corresponding to type II of the IUPAC classification, typical for mesoporous materials. The as-synthesized LDH and the Cu(Al)O mixed oxide surface area, pore volume, and pore size are shown in the Table S1. SEM-EDS analysis revealed the presence of Cu in the as-synthesized LDH and the mixed oxide structure, as shown in the emission spectra of Figure S5 and elemental composition (Table S2). The thermal decomposition behaviour of the as-synthesized and calcinated hydrotalcite was observed by TGA analysis in nitrogen atmosphere Figure S6.

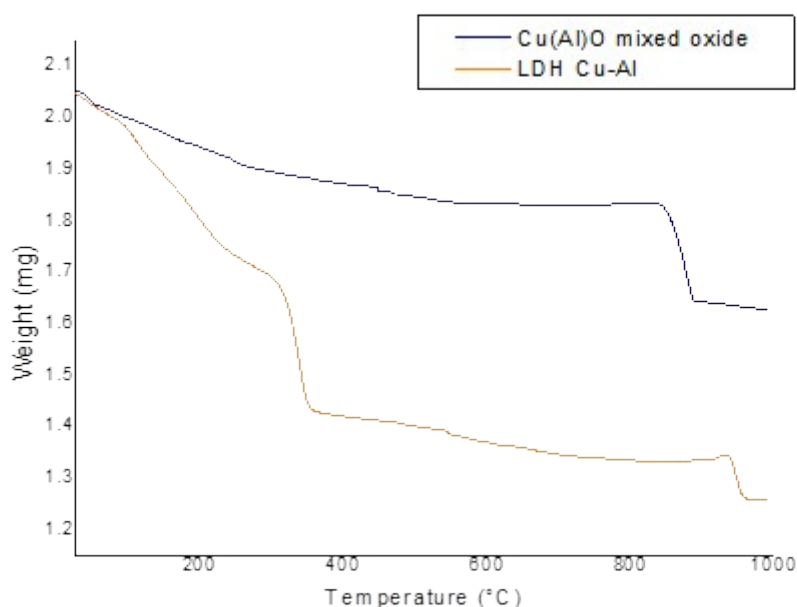

Figure S6

**Characterization of Cu(Al)O mixed oxides after ten catalytic cycles**

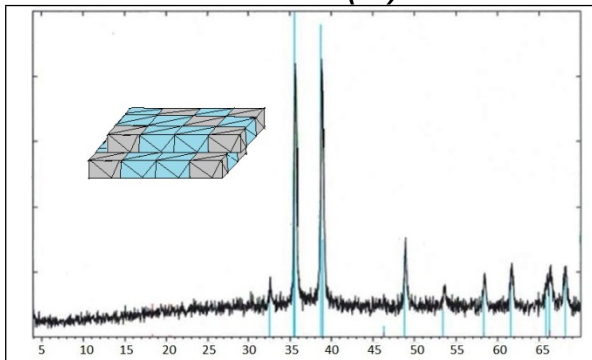

**Figure S7. X-ray diffraction patterns Cu(Al)O mixed oxide**

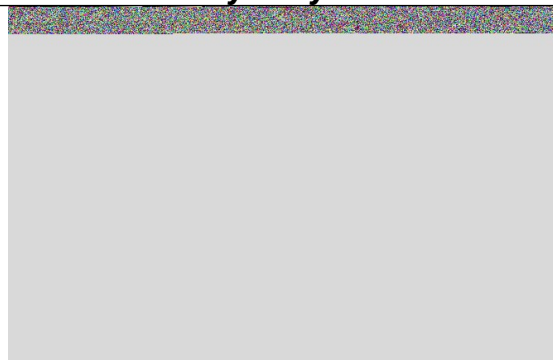

**Figure S8. Nitrogen adsorption-desorption isotherms of Cu(Al)O mixed oxide**

**Table S3. The nitrogen adsorption-desorption analysis parameters of Cu(Al)O mixed oxide**

| Parameters                             |      |
|----------------------------------------|------|
| $S_{BET}$<br>( $m^2 \cdot g^{-1}$ )    | 63   |
| Pore volume<br>( $cm^3 \cdot g^{-1}$ ) | 0.42 |
| Pore size (Å)                          | 174  |

**Table S4. Composition of materials Cu(Al)O mixed oxide**

| Element | Weight% |
|---------|---------|
| O       | 49.82   |
| Al      | 12.08   |
| Si      | 0.34    |
| Cu      | 37.76   |
| Total   | 100.00  |

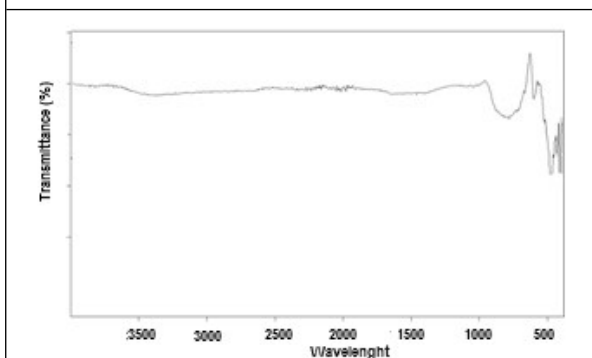

**Figure S9. IR spectra of Cu(Al)O mixed oxide**

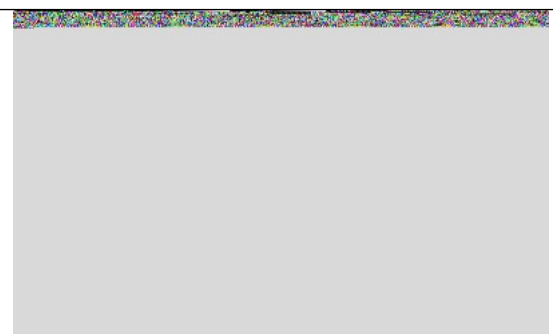

**Figure S10. SEM-EDX spectra of Cu(Al)O mixed oxide**

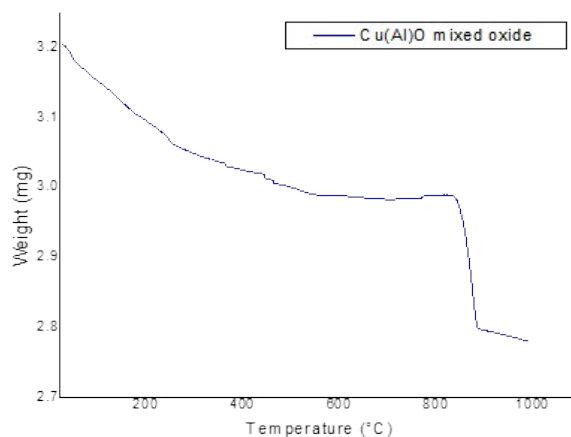

**Figure S11. Thermograms of of Cu(Al)O mixed oxide**

**Determination of Cu II in the recovered EtOH-H<sub>2</sub>O mixture**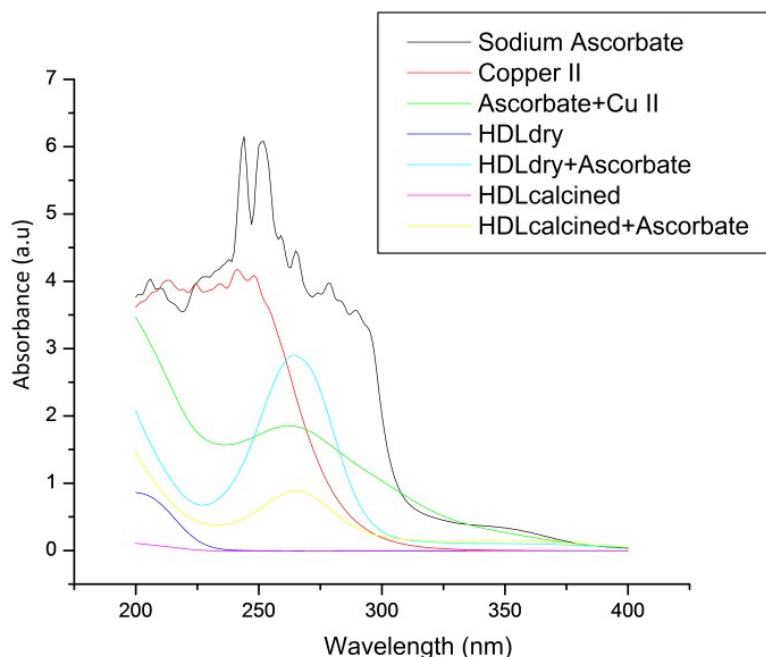

Figure S5. Quantification of Cu<sup>2+</sup> by UV in the mixture EtOH-H<sub>2</sub>O

**General procedure for the synthesis of 1,2,3-triazoles 3a-3g**

A mixture of catalyst (10 mg) and EtOH-H<sub>2</sub>O (2 mL, 3:1 v/v) was placed in a microwave tube having a magnetic stirrer. Subsequently, alkyne **1a-1e** (1 mmol), benzyl halide **2a-2e** (1.2 mmol), NaN<sub>3</sub> (1.2 mmol), and sodium ascorbate (10 mg), were added to the mixture, which was heated under microwave irradiation (30 W, 80 °C) during 10 minutes. Then, the material was removed by centrifugation and washed with CH<sub>2</sub>Cl<sub>2</sub> (5x5mL). The combined organic extracts were evaporated, giving the corresponding 1,2,3-triazole, which was purified by column chromatography (CH<sub>2</sub>Cl<sub>2</sub> or hexanes-EtOAc 1:1) and/or recrystallization (CH<sub>2</sub>Cl<sub>2</sub>-hexanes, 1:2).

**General procedure for the synthesis of alkynes 1b-1e**

Alkynes **1b-1c** were synthesized according to our previously reported method.<sup>1</sup>

Alkynes **1d-1e** were synthesized according to our previously reported method.<sup>2</sup>

**General procedure for the synthesis of steroidal mesylate derivatives**

Mesylates **4a**, **4c**, **4e** and **4g** were synthesized by literature procedures.<sup>3</sup>

**General procedure for the synthesis of steroidal azide derivative-s**

Azides **4b**, **4d**, **4f** and **4h** were synthesized by literature procedures.<sup>4</sup>

**General procedure for the synthesis of 1,2,3-triazoles 5a-5f from steroidal azide**

A mixture of catalyst (10 mg) and EtOH-H<sub>2</sub>O (2 mL, 3:1 v/v) was placed in a microwave tube having a magnetic stirrer. Subsequently, alkyne **1d-1e** (1 mmol), steroidal azide derivatives **4b**, **4d**, **4f** or **4h** (1.2 mmol), and sodium ascorbate (10 mg), were added to the mixture, which was heated under microwave irradiation (30 W, 80 °C) during 10 minutes. Then, the material was removed by centrifugation and washed with CH<sub>2</sub>Cl<sub>2</sub> (5x5mL). The combined organic extracts were evaporated, giving the corresponding 1,2,3-triazole, which was purified by column chromatography (CH<sub>2</sub>Cl<sub>2</sub> or hexanes-EtOAc 1:1) and recrystallization (CH<sub>2</sub>Cl<sub>2</sub>-hexanes, 1:2).

**General procedure for the synthesis of 1,2,3-triazoles 5a-5f from mesylate derivatives**

A mixture of catalyst (10 mg) and EtOH-H<sub>2</sub>O (2 mL,3:1) was placed in a microwave tube having a magnetic stirrer. Subsequently, alkyne **1d-1e** (1 mmol), mesilate derivatives **4a**, **4c**, **4e** or **4g** (1.2 mmol), NaN<sub>3</sub> (1.2 mmol), and sodium ascorbate (10 mg), were added to the mixture, which was heated under microwave irradiation (30 W, 80 °C) during 10 minutes. Then, the material was removed by centrifugation and washed with CH<sub>2</sub>Cl<sub>2</sub> (5x5mL). The combined organic extracts were evaporated, giving the corresponding 1,2,3-triazole, which was purified by column chromatography (CH<sub>2</sub>Cl<sub>2</sub> or hexanes-EtOAc 1:1) and recrystallization (CH<sub>2</sub>Cl<sub>2</sub>-hexanes, 1:2).

**General procedure to screen the recyclability**

A mixture of catalyst (10 mg) and EtOH-H<sub>2</sub>O (2 mL, 3:1 v/v) was placed in a microwave tube having a magnetic stirrer. Subsequently, alkyne **1a** (1 mmol), benzyl halide **2a** (1.2 mmol), NaN<sub>3</sub> (1.2 mmol), and sodium ascorbate (10 mg), were added to the mixture, which was heated under microwave irradiation (30 W, 80 °C) during 10 minutes. Then, the material was removed by centrifugation and washed with

CH<sub>2</sub>Cl<sub>2</sub> (5x5mL). The combined organic extracts were evaporated, giving the corresponding 1,2,3-triazole, which was purified by column chromatography (CH<sub>2</sub>Cl<sub>2</sub> or hexanes-EtOAc 1:1) and/or recrystallization (CH<sub>2</sub>Cl<sub>2</sub>-hexanes, 1:2).

### 3. Characterization data

#### 1-Benzyl-4-phenyl-1*H*-1,2,3-triazole (3a).

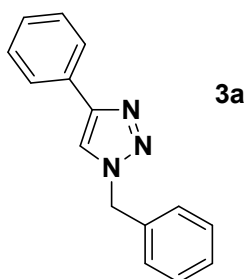

White solid, yield 98%, mp = 129-131 °C [Lit.<sup>5</sup> mp = 127-130 °C].

FT-IR/ATR  $\nu_{\max}$  cm<sup>-1</sup>: 3108, 3081, 1686, 1482, 1403. NMR <sup>1</sup>H (CDCl<sub>3</sub>, 500 MHz):  $\delta$  = 5.56 (s, 2H, NCH<sub>2</sub>), 7.28-7.32 (m, 3H, ArH), 7.35-7.41 (m, 5H, ArH), 7.65 (s, 1H, ArH, triazole), 7.77-7.80 (m, 2H, ArH). NMR <sup>13</sup>C (CDCl<sub>3</sub>, 125.7 MHz):  $\delta$  = 54.2 (NCH<sub>2</sub>), 119.5 (ArCH, triazole), 125.7 (2xArCH), 128.1 (2xArCH), 128.2 (ArCH), 128.78 (ArCH), 128.8 (2xArCH), 129.1 (2xArCH), 130.6 (C<sub>ipso</sub>), 134.7 (C<sub>ipso</sub>), 148.2 (C<sub>ipso</sub>, triazole). EM (CI) for C<sub>15</sub>H<sub>13</sub>N<sub>3</sub>  $m/z$ : 236 [M+1]<sup>+</sup>, 264 [M+29]<sup>+</sup>, 276 [M+41]<sup>+</sup>, 91 (PhCH<sub>2</sub>).

#### 1-(4-Fluorobenzyl)-4-phenyl-1*H*-1,2,3-triazole (3b).

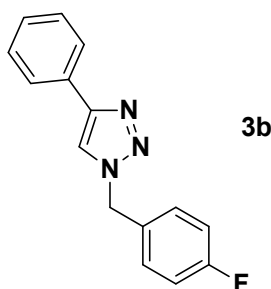

White solid, yield 90%, mp = 132-134 °C [Lit.<sup>5</sup> mp = 128-130 °C].

FT-IR/ATR  $\nu_{\max}$  cm<sup>-1</sup>: 3119, 3083, 1601, 1480, 1350. NMR <sup>1</sup>H (CDCl<sub>3</sub>, 500 MHz):  $\delta$  = 5.55 (s, 2H, NCH<sub>2</sub>), 7.06-7.11 (m, 2H, ArH), 7.30-7.36 (m, 3H, ArH), 7.40-7.44 (m, 2H, ArH), 7.68 (s, 1H, ArH, triazole), 7.80-7.83 (m, 2H, ArH). NMR <sup>13</sup>C (CDCl<sub>3</sub>, 125.7 MHz):  $\delta$  = 53.5 (NCH<sub>2</sub>), 116.1 (d,  $J$  = 22.6 Hz, 2xArCH), 119.4 (ArCH, triazole), 125.7 (2xArCH), 128.2 (ArCH), 128.8 (2xArCH), 129.9 (d,  $J$  = 8.8 Hz, 2xArCH), 130.4



(C<sub>ipso</sub>), 130.6 (d,  $J = 3.8$  Hz, C<sub>ipso</sub>), 148.3 (C<sub>ipso</sub>, triazole), 162.9 (d,  $J = 247.6$  Hz, F-C<sub>ipso</sub>).

### 1-(4-Chlorobenzyl)-4-phenyl-1*H*-1,2,3-triazole (3c).

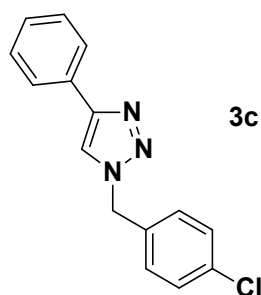

White solid, yield 95%, mp = 140-142 °C [Lit.<sup>5</sup> mp = 142-145 °C].

FT-IR/ATR  $\nu_{\max}$  cm<sup>-1</sup>: 3108, 3082, 3065, 1595, 1578, 1481, 1411. NMR <sup>1</sup>H (CDCl<sub>3</sub>, 500 MHz):  $\delta$  = 5.52 (s, 2H, NCH<sub>2</sub>), 7.21-7.24 (m, 2H, ArH), 7.29-7.36 (m, 3H, ArH), 7.37-7.41 (m, 2H, ArH), 7.66 (s, 1H, ArH, triazole), 7.77-7.80 (m, 2H, ArH). NMR <sup>13</sup>C (CDCl<sub>3</sub>, 125.7 MHz):  $\delta$  = 53.5 (NCH<sub>2</sub>), 119.5 (ArCH, triazole), 125.7 (2xArCH), 128.3 (ArCH), 128.8 (2xArCH), 129.35 (2xArCH), 129.36 (2xArCH), 130.4 (C<sub>ipso</sub>), 133.2 (C<sub>ipso</sub>), 134.8 (C<sub>ipso</sub>), 148.4 (C<sub>ipso</sub>, triazole). EM (CI) for C<sub>15</sub>H<sub>12</sub>ClN<sub>3</sub>  $m/z$ : 270 [M+1]<sup>+</sup>, 298 [M+29]<sup>+</sup>, 312 [M+41]<sup>+</sup>, 125 (Cl-PhCH<sub>2</sub>).

### 1-(4-Bromobenzyl)-4-phenyl-1*H*-1,2,3-triazole (3d).

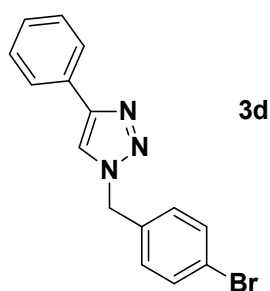

White solid, yield 85%, mp = 138-140 °C [Lit.<sup>6</sup> mp = 151-152 °C].

FT-IR/ATR  $\nu_{\max}$  cm<sup>-1</sup>: 3106, 3082, 3055, 1686, 1577, 1481, 1407. NMR <sup>1</sup>H (CDCl<sub>3</sub>, 500 MHz):  $\delta$  = 5.54 (s, 2H, NCH<sub>2</sub>), 7.19 (d,  $J = 8.7$  Hz, 2H, ArH), 7.32-7.36 (m, 1H, ArH), 7.40-7.44 (m, 2H, ArH), 7.53 (d,  $J = 8.7$  Hz, 2H, ArH), 7.69 (s, 1H, ArH, triazole), 7.80-7.83 (m, 2H, ArH). NMR <sup>13</sup>C (CDCl<sub>3</sub>, 125.7 MHz):  $\delta$  = 53.5 (NCH<sub>2</sub>), 119.5 (ArCH, triazole), 122.9 (Br-C<sub>ipso</sub>), 125.7 (2xArCH), 128.3 (ArCH), 128.8

(2xArCH), 129.6 (2xArCH), 130.4 (C<sub>ipso</sub>), 132.3 (2xArCH), 133.7 (C<sub>ipso</sub>), 148.4 (C<sub>ipso</sub>, triazole). EM (CI) for C<sub>15</sub>H<sub>12</sub>Br<sub>1</sub>N<sub>3</sub> *m/z*: 314 [M+1]<sup>+</sup>, 342 [M+29]<sup>+</sup>, 356 [M+41]<sup>+</sup>, 91 (PhCH<sub>2</sub>), 171 (Br-PhCH<sub>2</sub>), 236 (C<sub>15</sub>H<sub>13</sub>N<sub>3</sub>).

**1-(4-Iodobenzyl)-4-phenyl-1*H*-1,2,3-triazole (3e).**

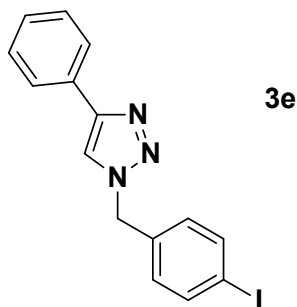

White solid, yield 90%, mp = 167-169 °C. [Lit.<sup>6</sup> mp = 154-156 °C].

FT-IR/ATR  $\nu_{\max}$  cm<sup>-1</sup>: 3108, 3081, 1686, 1581, 1482, 1403. NMR <sup>1</sup>H (CDCl<sub>3</sub>, 500 MHz):  $\delta$  = 5.49 (s, 2H, NCH<sub>2</sub>), 7.03 (d, *J* = 8.1 Hz, 2H, ArH), 7.25-7.33 (m, 1H, ArH), 7.37-7.41 (m, 2H, ArH), 7.66 (s, 1H, ArH, triazol), 7.70 (d, *J* = 8.3 Hz, 2H, ArH), 7.77-7.80 (m, 2H, ArH). NMR <sup>13</sup>C (CDCl<sub>3</sub>, 125.7 MHz):  $\delta$  = 53.7 (NCH<sub>2</sub>), 94.7 (I-C<sub>ipso</sub>), 119.6 (ArCH, triazole), 125.8 (2xArCH), 128.4 (ArCH), 128.9 (2xArCH), 129.9 (2xArCH), 130.4 (C<sub>ipso</sub>), 134.4 (C<sub>ipso</sub>), 138.4 (2xArCH), 148.5 (C<sub>ipso</sub>, triazole). EM (CI) para C<sub>15</sub>H<sub>12</sub>I<sub>1</sub>N<sub>3</sub> *m/z*: 362 [M+1]<sup>+</sup>, 390 [M+29]<sup>+</sup>, 402 [M+41]<sup>+</sup>, 217 (I-PhCH<sub>2</sub>), 236 (C<sub>15</sub>H<sub>13</sub>N<sub>3</sub>), 91 (PhCH<sub>2</sub>).

**1,3-Bis((1-benzyl-1*H*-1,2,3-triazol-4-yl)methyl)pyrimidine-2,4-(1*H*,3*H*)-dione (3f).**

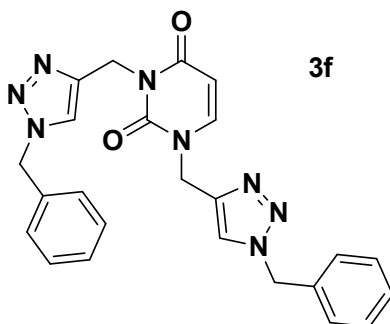

White solid, yield 90%, mp =175–176 °C [Lit.<sup>1</sup> mp = 171-172 °C].

FT-IR/ATR  $\nu_{\max}$  cm<sup>-1</sup>: 3133, 3067, 3012, 2954, 1700, 1650, 1555, 1496, 1452, 1434.

NMR <sup>1</sup>H (CDCl<sub>3</sub>, 500 MHz):  $\delta$  = 4.93 (s, 2H, CH<sub>2</sub>NC=O), 5.15 (s, 2H, CH<sub>2</sub>NC=O), 5.43 (s, 2H, NCH<sub>2</sub>Ph), 5.47 (s, 2H, NCH<sub>2</sub>Ph), 5.69 (d,  $J$  = 7.9 Hz, 1H, CH), 7.20–7.28 (m, 4H, ArH), 7.32–7.42 (m, 6H, ArH), 7.44 (d,  $J$  = 8.0 Hz, 1H, NCH), 7.49 (s, 1H, ArH, triazole), 7.62 (s, 1H, ArH, triazole). NMR <sup>13</sup>C (CDCl<sub>3</sub>, 125.7 MHz):  $\delta$  = 36.2 (CH<sub>2</sub>NC=O), 44.2 (CH<sub>2</sub>NC=O), 54.2 (NCH<sub>2</sub>Ph), 54.4 (NCH<sub>2</sub>Ph), 102.0 (CH), 123.4 (ArCH, triazole), 123.7 (ArCH, triazole), 128.2 (2×ArCH), 128.4 (2×ArCH), 128.8 (ArCH), 129.0 (ArCH), 129.1 (2×ArCH), 129.3 (2×ArCH), 134.2 (C<sub>ipso</sub>), 134.6 (C<sub>ipso</sub>), 142.3 (C<sub>ipso</sub>, triazole), 142.6 (NCH), 143.4 (C<sub>ipso</sub>, triazole), 151.2 (N<sub>2</sub>C=O), 162.6 (NC=O).

**1,3-bis((1-benzyl-1*H*-1,2,3-triazol-4-yl)methyl)-5-methylpyrimidine-2,4(1*H*,3*H*)-dione (3g).**

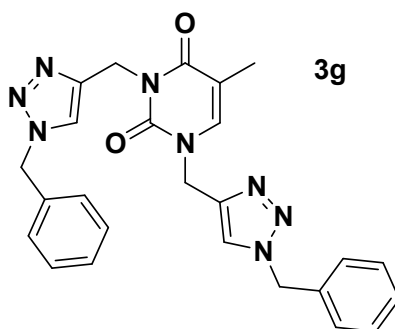

White solid, yield 90%, mp =187–189 °C [Lit.<sup>1</sup> mp = 187-189 °C].

FT-IR/ATR  $\nu_{\max}$  cm<sup>-1</sup>: 3133, 3115, 3068, 2956, 1697, 1672, 1646, 1550, 1496, 1453,

1432. NMR <sup>1</sup>H (CDCl<sub>3</sub>, 500 MHz):  $\delta$  = 1.86 (d,  $J$  = 1.0 Hz, 3H, CH<sub>3</sub>), 4.91 (s, 2H, CH<sub>2</sub>NC=O), 5.16 (s, 2H, CH<sub>2</sub>NC=O), 5.43 (s, 2H, NCH<sub>2</sub>Ph), 5.46 (s, 2H, NCH<sub>2</sub>Ph), 7.21–7.28 (m, 4H, ArH), 7.29 (d,  $J$  = 1.1 Hz, 1H, NCH), 7.30–7.37 (m, 6H, ArH), 7.49 (s, 1H, ArH, triazole), 7.62 (s, 1H, ArH, triazole). NMR <sup>13</sup>C (CDCl<sub>3</sub>, 125.7 MHz):  $\delta$  = 13.0 (CH<sub>3</sub>), 36.4 (CH<sub>2</sub>NC=O), 43.9 (CH<sub>2</sub>NC=O), 54.2 (NCH<sub>2</sub>Ph), 54.4 (NCH<sub>2</sub>Ph), 110.3 (CCH<sub>3</sub>), 123.5 (ArCH, triazole), 123.7 (ArCH, triazole), 128.2 (2×ArCH), 128.4 (2×ArCH), 128.8 (ArCH), 129.0 (ArCH), 129.1 (2×ArCH), 129.3 (2×ArCH), 134.3 (C<sub>ipso</sub>), 134.7 (C<sub>ipso</sub>), 138.7 (NCH), 142.6 (C<sub>ipso</sub>, triazole), 143.5 (C<sub>ipso</sub>, triazole), 151.2 (N<sub>2</sub>C=O), 163.5 (NC=O).

**(4*R*)-methyl 4-((3*S*,5*R*,10*S*,13*R*,17*R*)-3-(4-((2,4-dioxo-3,4-dihydropyrimidin-1(2*H*)-yl)methyl)-1*H*-1,2,3-triazol-1-yl)-10,13-dimethylhexadecahydro-1*H*-cyclopenta[*a*]phenanthren-17-yl)pentanoate (5a).**

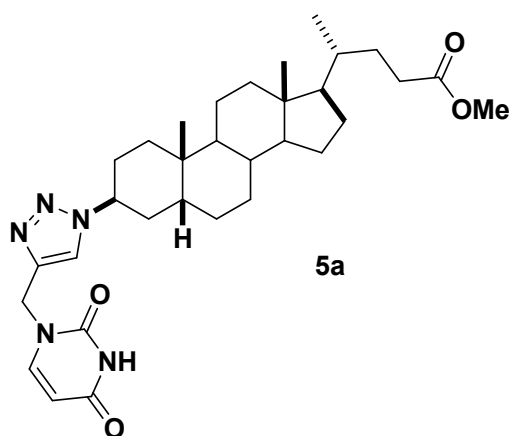

White solid, yield 90%, mp = 105-107°C,  $[\alpha]^{25}_D = +23.75$  (c 0.1, CHCl<sub>3</sub>).

NMR <sup>1</sup>H (500 MHz, CDCl<sub>3</sub>): δ = 0.65 (s, 3H, CH<sub>3</sub>), 0.91 (s, 3H, CH<sub>3</sub>), 0.92 (d, 3H, *J* = 6.5 Hz, CH<sub>3</sub>), 1.05-1.20 (m, 6H, CH<sub>2</sub>, CH), 1.24-1.48 (m, 9H, CH<sub>2</sub>, CH), 1.57-1.64 (m, 3H, CH<sub>2</sub>, CH), 1.76-1.92 (m, 3H, CH<sub>2</sub>), 1.96-2.04 (m, 3H, CH<sub>2</sub>), 2.14-2.18 (m, 1H, CH<sub>2</sub>), 2.19-2.26 (m, 1H, CH<sub>2</sub>), 2.35 (m, 2H, CH<sub>2</sub>), 3.66 (s, 3H, OCH<sub>3</sub>), 4.67 (m, 1H, CH), 5.01 (d, *J* = 15.0 Hz, 1H, CH), 5.02 (d, *J* = 15.0 Hz, 1H, CH), 5.72 (d, *J* = 7.0 Hz, 1H, CH), 7.58 (d, 1H, *J* = 7.0 Hz, CH), 7.76 (s, 1H, ArH, triazole), 9.25 (brs, 1H, NH). NMR <sup>13</sup>C (125.7 MHz, CDCl<sub>3</sub>): δ = 12.0 (CH<sub>3</sub>), 18.3 (CH<sub>3</sub>), 21.0 (CH<sub>2</sub>), 23.8 (CH<sub>3</sub>), 24.2 (CH<sub>2</sub>), 24.9 (CH<sub>2</sub>), 26.1 (CH<sub>2</sub>), 26.4 (CH<sub>2</sub>), 28.2 (CH<sub>2</sub>), 29.8 (CH<sub>2</sub>), 30.7 (CH<sub>2</sub>), 31.0 (CH<sub>2</sub>), 31.1 (CH<sub>2</sub>), 34.8 (C), 35.4 (CH), 35.6 (CH), 37.3 (CH), 40.1 (CH<sub>2</sub>), 40.5 (CH), 42.8 (C), 43.0 (CH<sub>2</sub>), 51.5 (OCH<sub>3</sub>), 56.0 (CH), 56.6 (CH), 57.1 (CH), 102.6 (=CH), 122.8 (ArCH, triazole), 141.2 (C<sub>ipso</sub>, triazole), 144.4 (=CH), 150.9 (NC=O), 163.6 (NC=O), 174.8 (OC=O). FT-IR/ATR  $\nu_{\max}$  cm<sup>-1</sup>: 3487, 2934, 2862, 1732, 1712,

Supporting Information

1675, 1462, 1436, 1241, 1208. HRMS (ESI-TOF) calculated for  $C_{32}H_{47}N_5O_4 + H^+$ : 566.3701; Found: 566.3702.

**(4*R*)-methyl 4-((3*S*,5*R*,10*S*,13*R*,17*R*)-10,13-dimethyl-3-(4-((5-methyl-2,4-dioxo-3,4-dihydropyrimidin-1(2*H*)-yl)methyl)-1*H*-1,2,3-triazol-1-yl)hexadecahydro-1*H*-cyclopenta[*a*]phenanthren-17-yl)pentanoate (5b).**

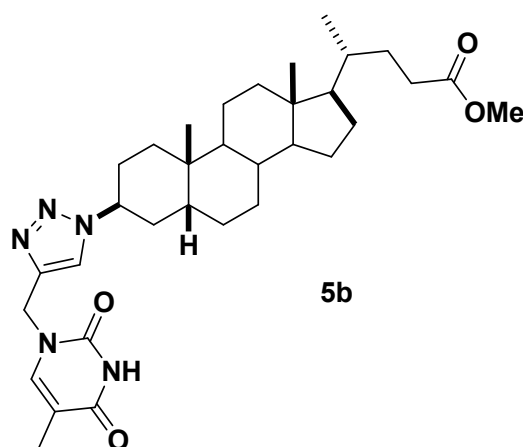

White solid, yield 98%, mp = 163-165°C,  $[\alpha]^{25}_D = +21.52$  (c 0.1,  $CHCl_3$ ).

NMR  $^1H$  (500 MHz,  $CDCl_3$ ):  $\delta$  = 0.64 (s, 3H,  $CH_3$ ), 0.90 (s, 3H,  $CH_3$ ), 0.91 (d, 3H,  $J$  = 6.4 Hz,  $CH_3$ ), 1.04-1.20 (m, 6H,  $CH_2$ , CH), 1.24-1.37 (m, 4H,  $CH_2$ ), 1.38-1.48 (m, 5H,  $CH_2$ , CH), 1.57-1.64 (m, 3H,  $CH_2$ , CH), 1.76-1.89 (m, 3H,  $CH_2$ ), 1.90 (d,  $J$  = 1.1 Hz, 3H,  $CH_3$ ), 1.92-2.04 (m, 3H,  $CH_2$ ), 2.14-2.18 (m, 1H,  $CH_2$ ), 2.19-2.25 (m, 1H,  $CH_2$ ), 2.35 (m, 2H,  $CH_2$ ), 3.66 (s, 3H,  $OCH_3$ ), 4.66 (m, 1H, CH), 4.94 (d,  $J$  = 15.0 Hz, 1H, CH), 4.98 (d,  $J$  = 15.0 Hz, 1H, CH), 7.37 (q,  $J$  = 1.2 Hz, 1H, CH), 7.73 (s, 1H, ArH, triazole), 9.04 (s, 1H, NH). NMR  $^{13}C$  (125.7 MHz,  $CDCl_3$ ):  $\delta$  = 12.1 ( $CH_3$ ), 12.3 ( $CH_3$ , thymine), 18.3 ( $CH_3$ ), 21.0 ( $CH_2$ ), 23.8 ( $CH_3$ ), 24.2 ( $CH_2$ ), 24.9 ( $CH_2$ ), 26.1 ( $CH_2$ ), 26.4 ( $CH_2$ ), 28.2 ( $CH_2$ ), 29.8 ( $CH_2$ ), 30.7 (C), 31.0 ( $CH_2$ ), 31.1 ( $CH_2$ ), 34.8 (C), 35.4 (CH), 35.6 (CH), 37.3 (CH), 40.2 ( $CH_2$ ), 40.5 (CH), 42.76 (C), 42.8 ( $CH_2$ ), 51.5 ( $OCH_3$ ), 56.0 (CH), 56.6 (CH), 57.1 (CH), 111.2 (=C), 122.7 (ArCH, triazole), 140.3 (=CH), 141.5 ( $C_{ipso}$ , triazole), 150.9 (NC=ON), 164.1 (NC=O), 174.7 (OC=O). FT-

Supporting Information

IR/ATR  $\nu_{\max}$   $\text{cm}^{-1}$ : 2925, 2860, 1733, 1674, 1655, 1450, 1434, 1215, 1101, 1048, 777. HRMS (ESI-TOF) calculated for  $\text{C}_{33}\text{H}_{49}\text{N}_5\text{O}_4 + \text{H}^+$ : 580.3857; Found: 580.3860.

**(4R)-methyl4-((5R,10S,12S,13R,17R)-3-(4-((2,4-dioxo-3,4-dihydropyrimidin-1(2H)-yl)methyl)-1H-1,2,3-triazol-1-yl)-12-hydroxy-10,13-dimethylhexadecahydro-1H-cyclopenta[a]phenanthren-17-yl)pentanoate (5c).**

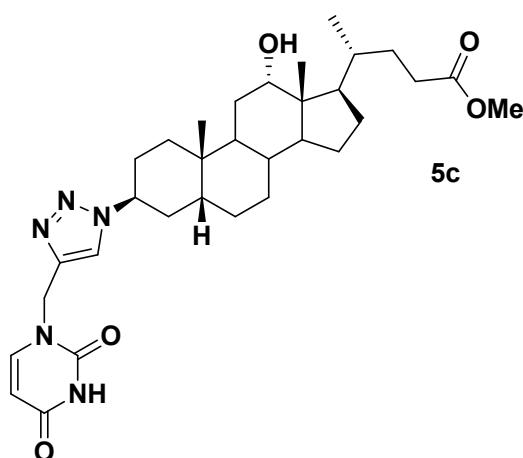

White solid, yield 65%, mp = 99-101°C,  $[\alpha]_{\text{D}}^{25} = +42.80$  (c 0.1,  $\text{CHCl}_3$ ).

NMR  $^1\text{H}$  (500 MHz,  $\text{CDCl}_3$ ):  $\delta$  = 0.68 (s, 3H,  $\text{CH}_3$ ), 0.89 (s, 3H,  $\text{CH}_3$ ), 0.96 (d, 3H,  $J$  = 6.5 Hz,  $\text{CH}_3$ ), 1.05-1.20 (m, 5H,  $\text{CH}_2$ , CH), 1.24-1.48 (m, 9H,  $\text{CH}_2$ , CH), 1.57-1.64 (m, 3H,  $\text{CH}_2$ , CH), 1.76-1.92 (m, 3H,  $\text{CH}_2$ ), 1.96-2.04 (m, 2H,  $\text{CH}_2$ ), 2.14-2.18 (m, 1H,  $\text{CH}_2$ ), 2.19-2.26 (m, 1H,  $\text{CH}_2$ ), 2.35 (m, 2H,  $\text{CH}_2$ ), 3.65 (s, 3H,  $\text{OCH}_3$ ), 4.00 (dd,  $J$  = 3.8, 3.8 Hz, 1H, CH), 4.64 (m, 1H, CH), 4.96 (d,  $J$  = 15.1 Hz, 1H, CH), 5.0 (d,  $J$  = 15.1 Hz, 1H, CH), 5.69 (d,  $J$  = 7.9 Hz, 1H, CH), 7.55 (d, 1H,  $J$  = 7.9 Hz, CH), 7.74 (s, 1H, ArH, triazole), 9.47 (brs, 1H, NH). NMR  $^{13}\text{C}$  (125.7 MHz,  $\text{CDCl}_3$ ):  $\delta$  = 12.8 ( $\text{CH}_3$ ), 17.4 ( $\text{CH}_3$ ), 23.6 ( $\text{CH}_2$ ), 23.7 ( $\text{CH}_3$ ), 24.9 ( $\text{CH}_2$ ), 25.9 ( $\text{CH}_2$ ), 26.4 ( $\text{CH}_2$ ), 27.5 ( $\text{CH}_2$ ), 28.8 ( $\text{CH}_2$ ), 29.8 ( $\text{CH}_2$ ), 30.6 ( $\text{CH}_2$ ), 31.0 ( $\text{CH}_2$ ), 31.1 ( $\text{CH}_2$ ), 33.7 (CH), 34.4 (C), 35.1 (CH), 35.9 (CH), 37.3 (CH), 43.0 ( $\text{CH}_2$ ), 46.6 (C), 47.5 (C), 48.4 ( $\text{CH}_2$ ), 51.6 ( $\text{OCH}_3$ ), 57.2 (CH), 73.2 (CH), 102.7 (=CH), 122.9 (ArCH, triazole), 141.3 ( $\text{C}_{\text{ipso}}$ , triazole), 144.5 (=CH), 151.1 (NC=ON), 163.8 (NC=O), 174.7 (OC=O). IR/ATR  $\nu_{\max}$   $\text{cm}^{-1}$ :

4828, 3071, 2931, 1678, 1448, 1376, 1348, 1243, 1093. HRMS (ESI-TOF) calculated for  $C_{32}H_{47}N_5O_5 + H^+$ : 582.3650; Found: 582.3653.

**(4*R*)-methyl4-((5*R*,10*S*,12*S*,13*R*,17*R*)-12-hydroxy-10,13-dimethyl-3-(4-((5-methyl-2,4-dioxo-3,4-dihydropyrimidin-1(2*H*)-yl)methyl)-1*H*-1,2,3-triazol-1-yl)hexadecahydro-1*H*-cyclopenta[*a*]phenanthren-17-yl)pentanoate (5d).**

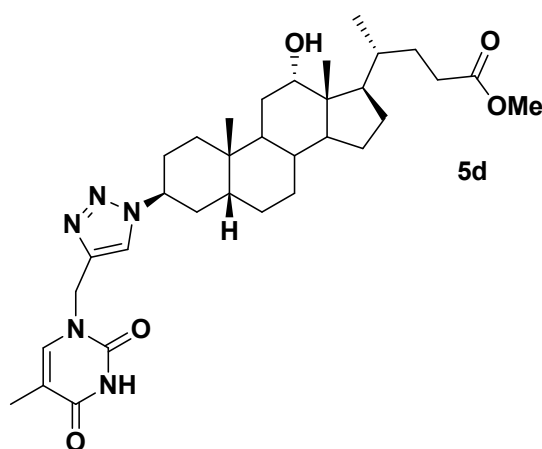

White solid, yield 70%, mp = 106-108°C [ $\alpha$ ]<sub>D</sub><sup>25</sup> = +46.97 (c 0.1, CHCl<sub>3</sub>).

NMR <sup>1</sup>H (500 MHz, CDCl<sub>3</sub>):  $\delta$  = 0.67 (s, 3H, CH<sub>3</sub>), 0.68 (s, 3H, CH<sub>3</sub>), 0.89 (d, 3H, *J* = 6.4 Hz, CH<sub>3</sub>), 1.04-1.20 (m, 5H, CH<sub>2</sub>, CH), 1.24-1.37 (m, 4H, CH<sub>2</sub>), 1.38-1.48 (m, 5H, CH<sub>2</sub>, CH), 1.57-1.64 (m, 3H, CH<sub>2</sub>, CH), 1.76-1.89 (m, 3H, CH<sub>2</sub>), 1.90 (d, *J* = 1.1 Hz, 3H, CH<sub>3</sub>), 1.92-2.04 (m, 2H, CH<sub>2</sub>), 2.14-2.18 (m, 1H, CH<sub>2</sub>), 2.19-2.25 (m, 1H, CH<sub>2</sub>), 2.35 (m, 2H, CH<sub>2</sub>), 3.66 (s, 3H, OCH<sub>3</sub>), 4.01 (dd, *J* = 2.6, 2.6 Hz, 1H, CH), 4.64 (m, 1H, CH), 4.96 (d, *J* = 14.8 Hz, 1H, CH), 4.97 (d, *J* = 14.8 Hz, 1H, CH), 7.37 (q, *J* = 1.2 Hz, 1H, CH), 7.73 (s, 1H, ArH, triazole), 8.89 (s, 1H, NH). NMR <sup>13</sup>C (125.7 MHz, CDCl<sub>3</sub>):  $\delta$  = 12.2 (CH<sub>3</sub>), 12.7 (CH<sub>3</sub>, thymine), 17.3 (CH<sub>3</sub>), 23.5 (CH<sub>3</sub>), 23.5 (CH<sub>2</sub>), 24.7 (CH<sub>2</sub>), 25.8 (CH<sub>2</sub>), 26.2 (CH<sub>2</sub>), 27.4 (CH<sub>2</sub>), 28.7 (CH<sub>2</sub>), 29.7 (CH<sub>2</sub>), 30.5 (CH<sub>2</sub>), 30.8 (CH<sub>2</sub>), 31.0 (CH<sub>2</sub>), 33.6 (CH), 35.0 (C), 35.7 (CH), 35.8 (CH), 37.2 (CH), 42.7 (CH<sub>2</sub>), 46.6 (C), 47.4 (CH), 48.3 (CH), 51.5 (OCH<sub>3</sub>), 57.2 (CH), 73.1 (CH), 111.1 (=C), 122.7 (ArCH, triazole), 140.3 (=CH), 150.7 (C<sub>ipso</sub>, triazole), 164.0 (NC=ON), 174.6 (NC=O), 174.6 (OC=O). IR /ATR  $\nu_{max}$  cm<sup>-1</sup>: 4828, 3071, 2931, 1678, 1448,

## Supporting Information

1376,1348,1243,1093. HRMS (ESI-TOF) calculated for  $C_{33}H_{49}N_5O_5 + H^+$  : 596.3767;  
Found: 596.3760.



**(4R)-methyl 4-((3S,5S,7R,10S,13R,17R)-7-acetoxy-10,13-dimethyl-3-(4-((5-methyl-2,4-dioxo-3,4-dihydropyrimidin-1(2H)-yl)methyl)-1H-1,2,3-triazol-1-yl)hexadecahydro-1H-cyclopenta[a]phenanthren-17-yl)pentanoate (5e).**

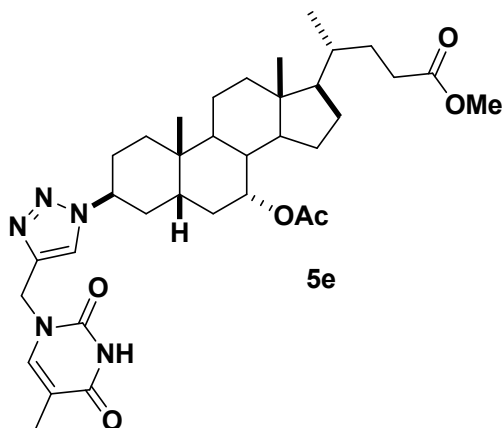

White solid, yield 95%, mp = 99-102°C,  $[\alpha]^{25}_{\text{D}} = +25.29$  (c 0.1, CHCl<sub>3</sub>).

NMR <sup>1</sup>H (500 MHz, CDCl<sub>3</sub>):  $\delta$  = 0.66 (s, 3H, CH<sub>3</sub>), 0.92 (s, 3H, CH<sub>3</sub>), 0.93 (d,  $J$  = 6.6 Hz, 3H, CH<sub>3</sub>), 1.05-1.52 (m, 11H, CH<sub>2</sub>, CH), 1.58-1.70 (m, 4H, CH<sub>2</sub>, CH), 1.76-1.88 (m, 3H, CH<sub>2</sub>, CH), 1.90 (d,  $J$  = 0.8 Hz, 3H, CH<sub>3</sub>, thymine), 1.95-2.03 (m, 3H, CH<sub>2</sub>), 2.06 (s, 3H, CH<sub>3</sub>, acetyl), 2.08-2.26 (m, 2H, CH<sub>2</sub>), 2.34 (ddd,  $J$  = 14.0, 10.0, 5.0 Hz, 1H, CH<sub>2</sub>), 2.61 (td,  $J$  = 14.0, 4.7, Hz, 1H, CH<sub>2</sub>), 3.66 (s, 3H, OCH<sub>3</sub>), 4.75 (m, 1H, CH), 4.91 (ddd,  $J$  = 14.0, 8.5, 3.0 Hz, 1H, CH), 4.93 (d,  $J$  = 15.1 Hz, 1H, CH), 4.96 (d,  $J$  = 15.1 Hz, 1H, CH), 7.35 (q,  $J$  = 0.8 Hz, 1H, =CH), 7.72 (s, 1H, ArH, triazole), 8.77 (brs, 1H, NH). NMR <sup>13</sup>C (CDCl<sub>3</sub>, 125.7 MHz):  $\delta$  = 11.7 (CH<sub>3</sub>), 12.3 (CH<sub>3</sub>, thymine), 18.3 (CH<sub>3</sub>), 20.8 (CH<sub>2</sub>), 21.5 (CH<sub>3</sub>, acetyl), 23.0 (CH<sub>3</sub>), 23.5 (CH<sub>2</sub>), 24.8 (CH<sub>2</sub>), 28.0 (CH<sub>2</sub>), 30.7 (CH<sub>2</sub>), 30.88 (CH<sub>2</sub>), 30.93 (CH<sub>2</sub>), 31.0 (CH<sub>2</sub>), 32.0 (CH<sub>2</sub>), 34.2 (CH), 35.0 (C), 35.3 (CH), 36.4 (CH), 37.8 (CH), 39.5 (CH<sub>2</sub>), 42.7 (C), 42.9 (CH<sub>2</sub>), 50.4 (CH), 51.5 (OCH<sub>3</sub>), 55.7 (CH), 56.9 (CH), 71.3 (CH), 111.1 (=C), 122.7 (ArCH, triazole), 140.2 (=CH), 141.6 (C<sub>ipso</sub>, triazole), 150.8 (NC=ON), 163.9 (NC=O), 170.1 (OC=O, acetyl), 174.6 (OC=O). FT-IR/ATR  $\nu_{\text{max}}$  cm<sup>-1</sup>: 4848, 2930, 1679, 1436, 1373, 1244, 1018. HRMS (ESI-TOF) calculated for C<sub>35</sub>H<sub>51</sub>N<sub>5</sub>O<sub>6</sub> + H<sup>+</sup>: 638.3912; Found: 638.3910.

**(3*S*,5*S*,7*R*,10*S*,12*S*,13*R*,17*R*)-17-((*R*)-5-methoxy-5-oxopentan-2-yl)-10,13-dimethyl-3-(4-((5-methyl-2,4-dioxo-3,4-dihydropyrimidin-1(2*H*)-yl)methyl)-1*H*-1,2,3-triazol-1-yl)hexadecahydro-1*H*-cyclopenta[*a*]phenanthrene-7,12-diyl diacetate (**5f**).**

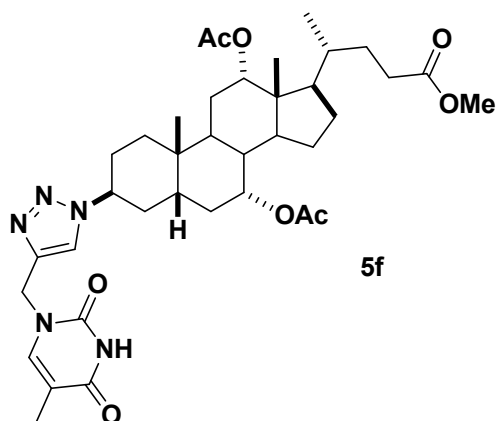

White solid, yield 90%, mp = 96-99°C,  $[\alpha]_D^{25} = +35.42$  (c 0.1, CHCl<sub>3</sub>).

NMR <sup>1</sup>H (500 MHz, CDCl<sub>3</sub>): δ = 0.73 (s, 3H, CH<sub>3</sub>), 0.81 (d, *J* = 6.5 Hz, 3H, CH<sub>3</sub>), 0.90 (s, 3H, CH<sub>3</sub>), 1.09-1.21 (m, 2H, CH<sub>2</sub>), 1.24-1.47 (m, 4H, CH<sub>2</sub>, CH), 1.53-1.70 (m, 6H, CH<sub>2</sub>, CH), 1.72-1.87 (m, 5H, CH<sub>2</sub>, CH), 1.90 (d, 3H, *J* = 1.2 Hz, CH<sub>3</sub>), 1.95-2.08 (m, 2H, CH<sub>2</sub>, CH), 2.10 (s, 3H, CH<sub>3</sub>, acetyl), 2.11-2.13 (m, 2H, CH<sub>2</sub>), 2.14 (s, 3H, CH<sub>3</sub>, acetyl), 2.18-2.24 (m, 1H, CH<sub>2</sub>), 2.32-2.38 (m, 1H, CH<sub>2</sub>), 2.34 (ddd, *J* = 14.0, 10.0, 5.0 Hz, 1H, CH<sub>2</sub>), 2.59 (td, *J* = 14.0, 4.0 Hz, 1H, CH<sub>2</sub>), 3.66 (s, 3H, OCH<sub>3</sub>), 4.60 (m, 1H, CH), 4.94 (s, 2H, CH), 4.95 (m, 1H, CH), 5.10 (dd, *J* = 2.3, 2.3 Hz, 1H, CH), 7.35 (q, *J* = 1.2 Hz, 1H, =CH), 7.69 (s, 1H, ArH, triazole), 8.58 (brs, 1H, NH). NMR <sup>13</sup>C (CDCl<sub>3</sub>, 125.7 MHz): δ = 12.2 (CH<sub>3</sub>), 12.3 (CH<sub>3</sub>, thymine), 17.5 (CH<sub>3</sub>), 21.4 (CH<sub>3</sub>, acetyl), 21.6 (CH<sub>3</sub>, acetyl), 22.8 (CH<sub>3</sub>, CH<sub>2</sub>), 24.7 (CH<sub>2</sub>), 25.7 (CH<sub>2</sub>), 27.2 (CH<sub>2</sub>), 29.0 (CH), 30.3 (CH<sub>2</sub>), 30.77 (CH<sub>2</sub>), 30.81 (CH<sub>2</sub>), 30.9 (CH<sub>2</sub>), 31.9 (CH<sub>2</sub>), 34.5 (C), 34.6 (CH), 36.2 (CH), 37.7 (CH), 42.8 (C), 43.3 (CH), 45.1 (C), 47.4 (CH), 51.5 (OCH<sub>3</sub>), 56.7 (CH), 70.8 (CH), 75.4 (CH), 111.1 (=C), 122.6 (ArCH, triazole), 140.2 (=CH), 141.6 (C<sub>ipso</sub>, triazole), 150.7 (NC=ON), 163.8 (NC=O), 170.1 (OC=O, acetyl), 170.4 (OC=O, acetyl), 174.5 (OC=O). FT-IR/ATR ν<sub>max</sub> cm<sup>-1</sup>: 4920, 2926, 1682, 1446, 1375, 1242, 1025. HRMS (ESI-TOF) calculated for C<sub>37</sub>H<sub>53</sub>N<sub>5</sub>O<sub>8</sub> + H<sup>+</sup>: 696.3967; Found: 696.3964.

4.  $^1\text{H}$  and  $^{13}\text{C}$  NMR spectra for 1,2,3 triazoles $^1\text{H}$  NMR and  $^{13}\text{C}$  NMR for compound 3a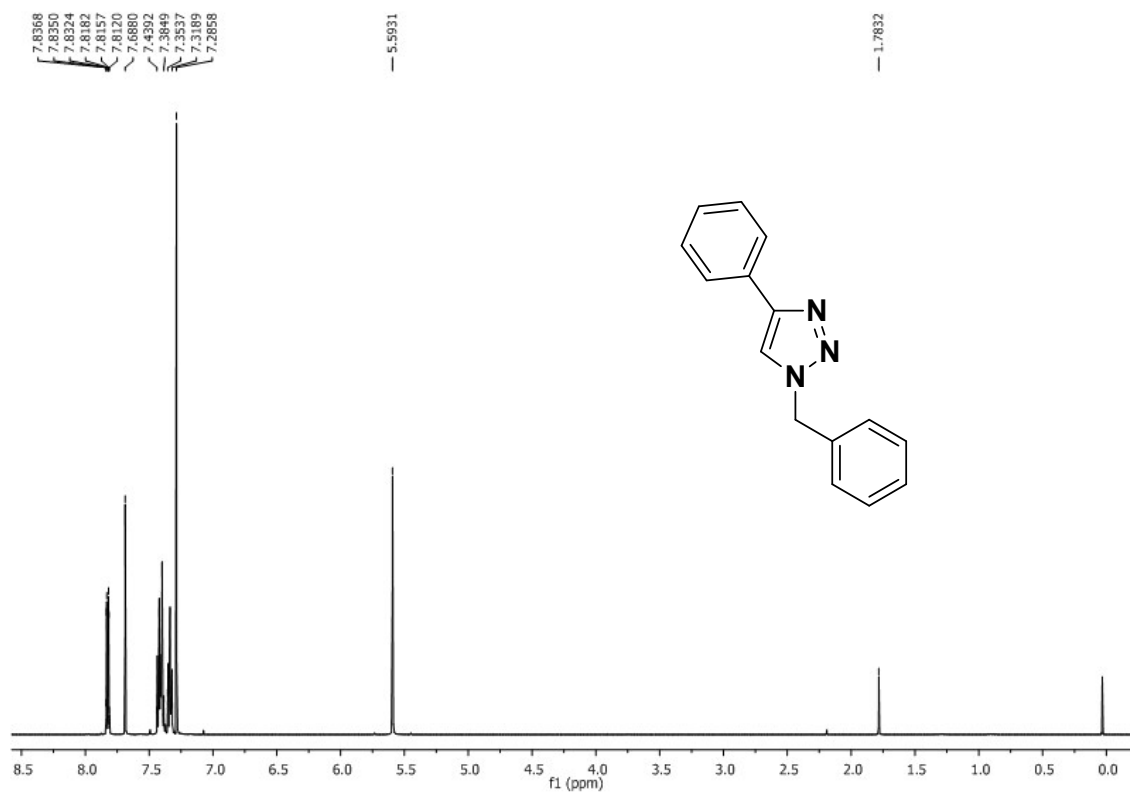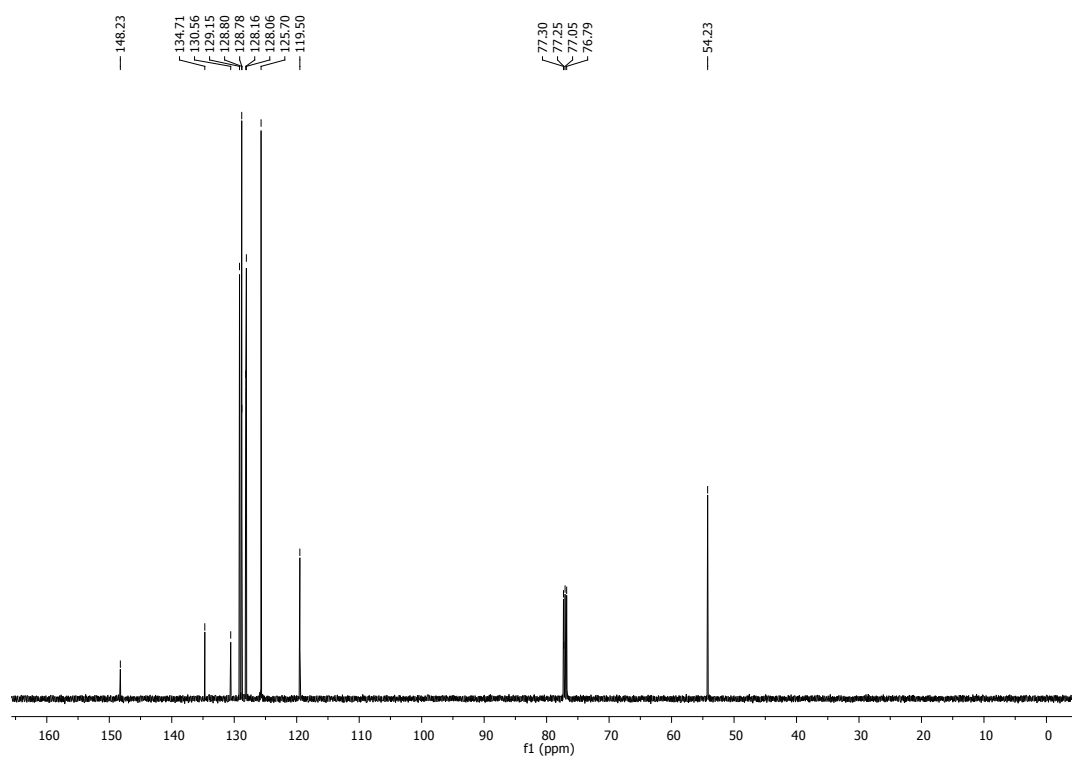

Supporting Information

$^1\text{H}$  NMR and  $^{13}\text{C}$  NMR for compound 3b

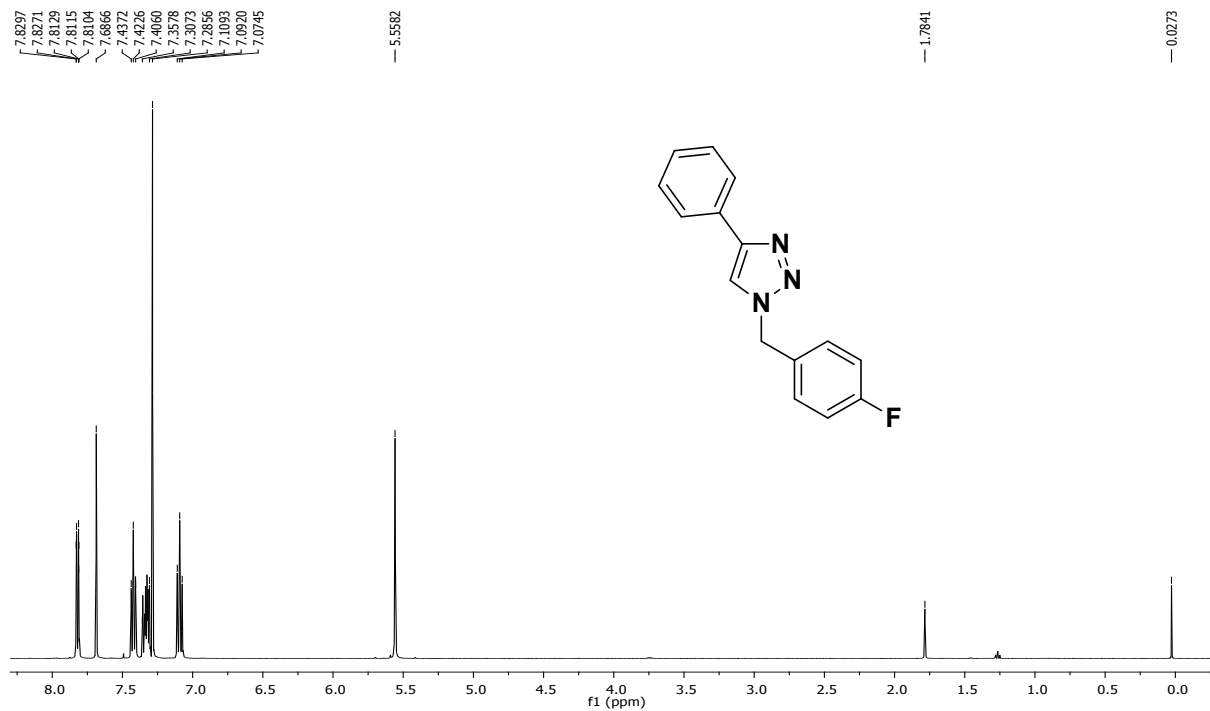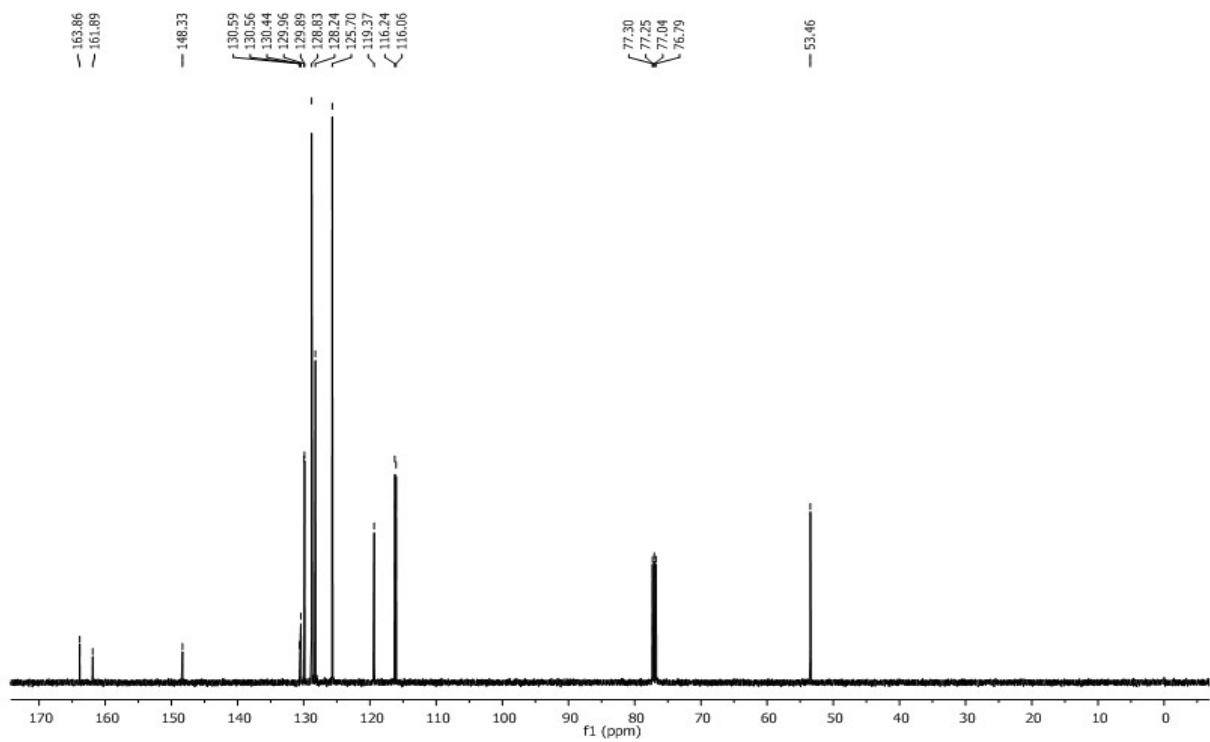

# Supporting Information

## $^1\text{H}$ NMR and $^{13}\text{C}$ NMR for compound 3c

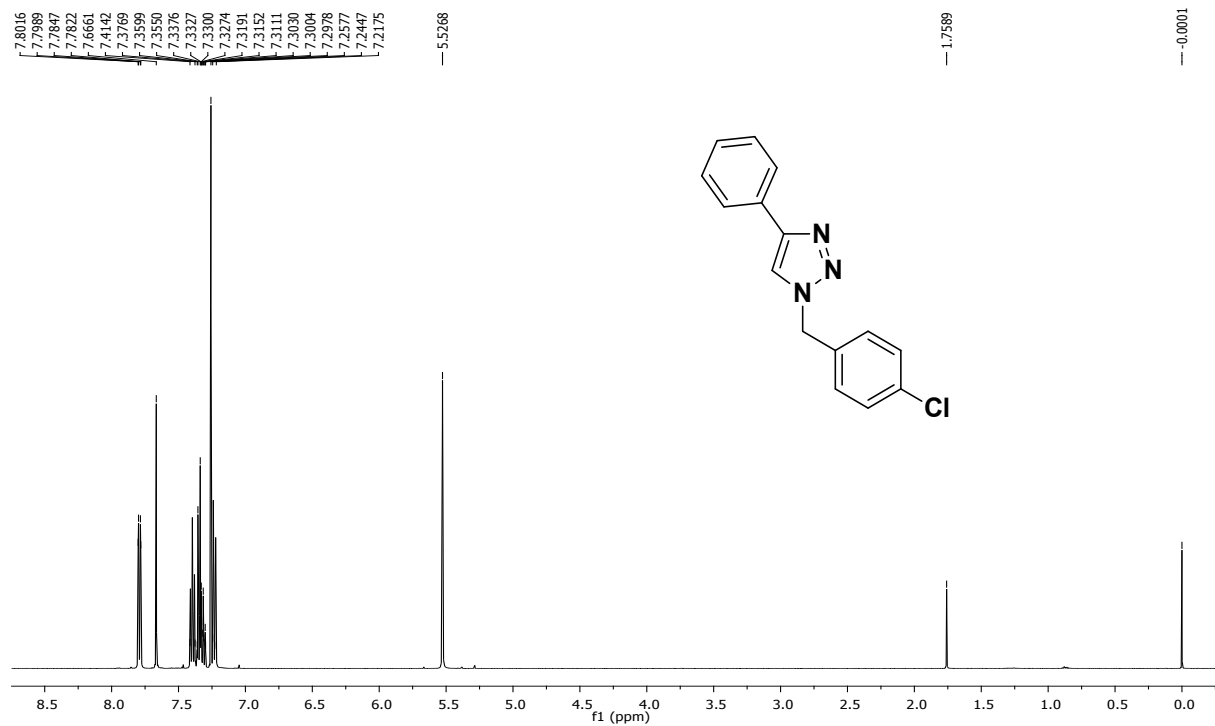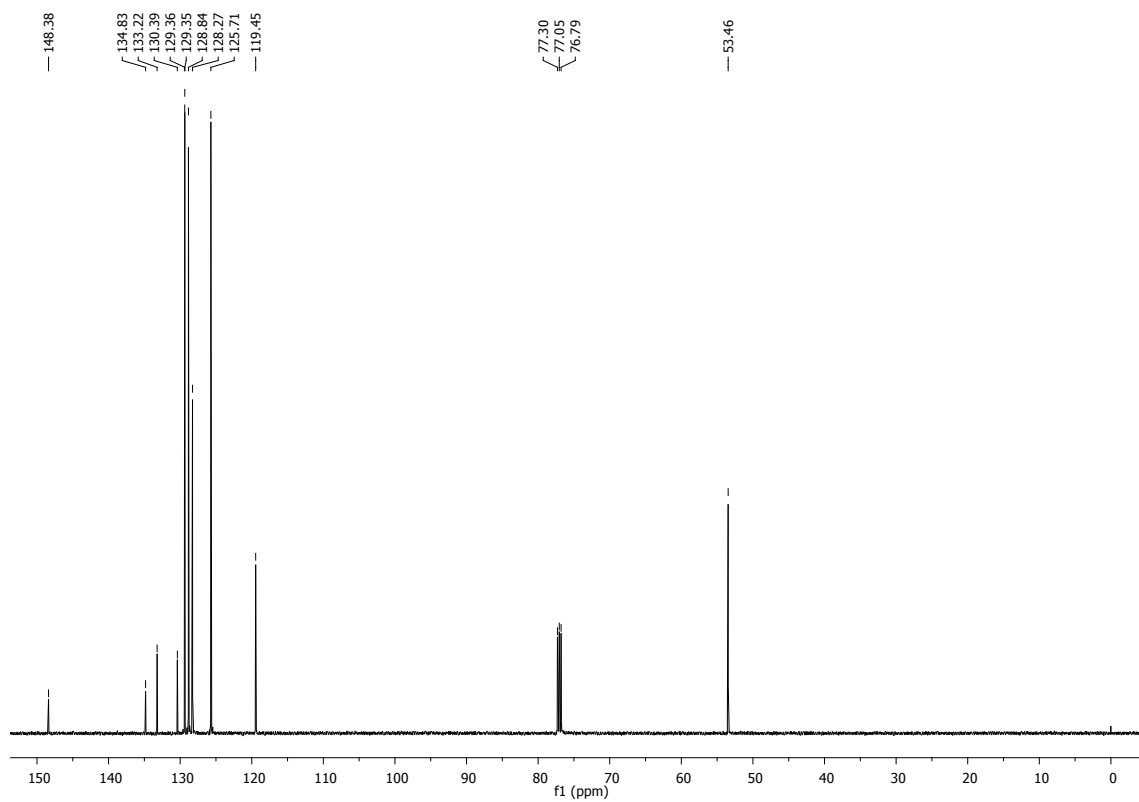

# Supporting Information

## $^1\text{H}$ NMR and $^{13}\text{C}$ NMR for compound 3d

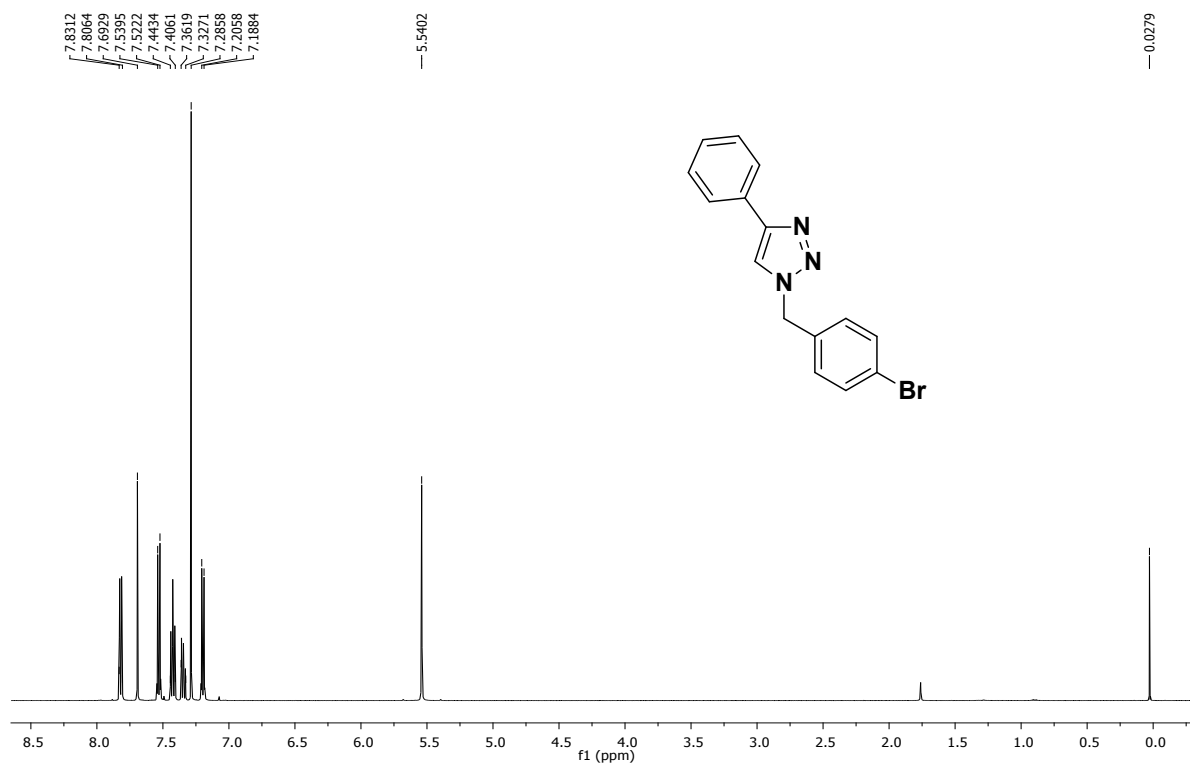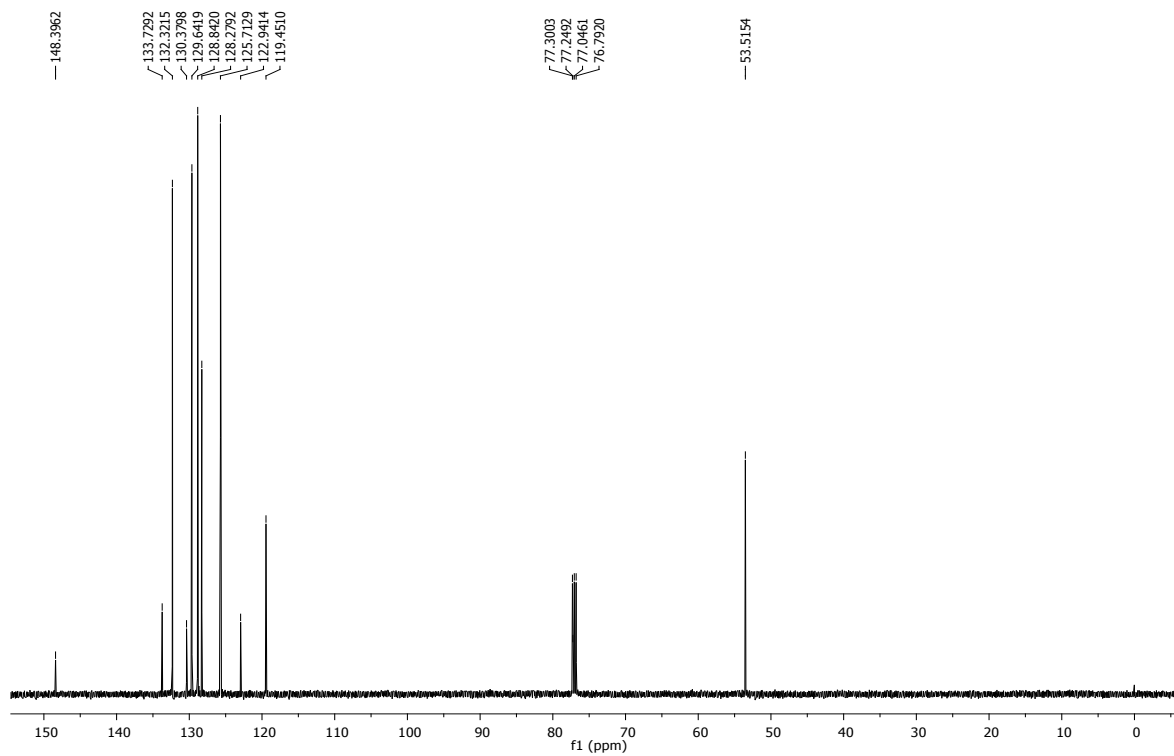

# Supporting Information

## $^1\text{H}$ NMR and $^{13}\text{C}$ NMR for compound 3e

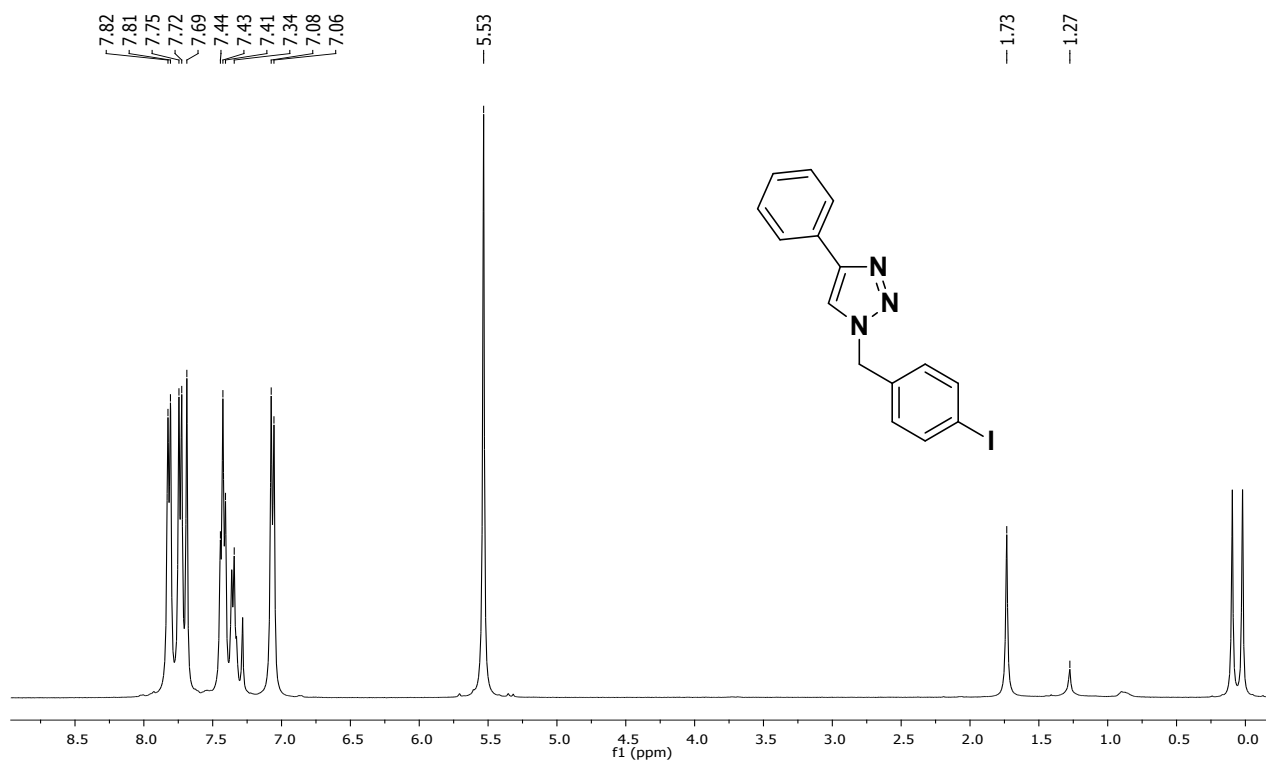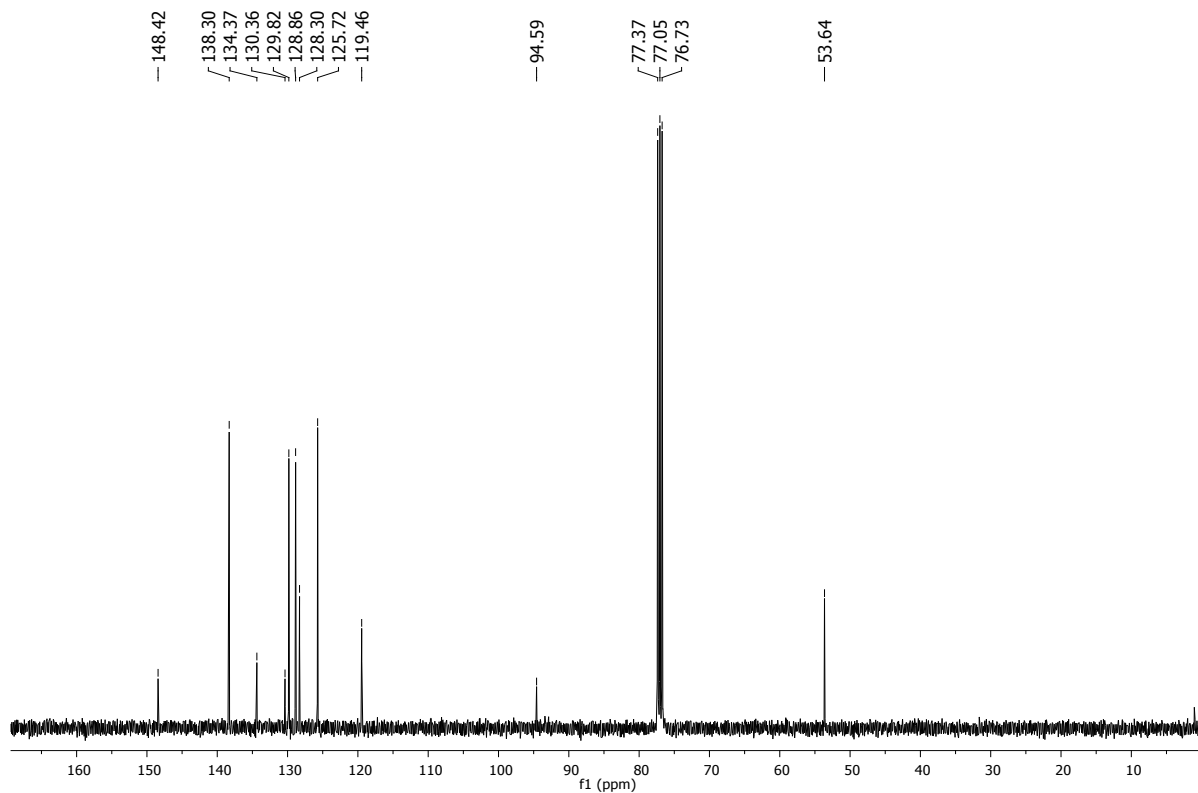

# Supporting Information

## $^1\text{H}$ NMR and $^{13}\text{C}$ NMR for compound 3f

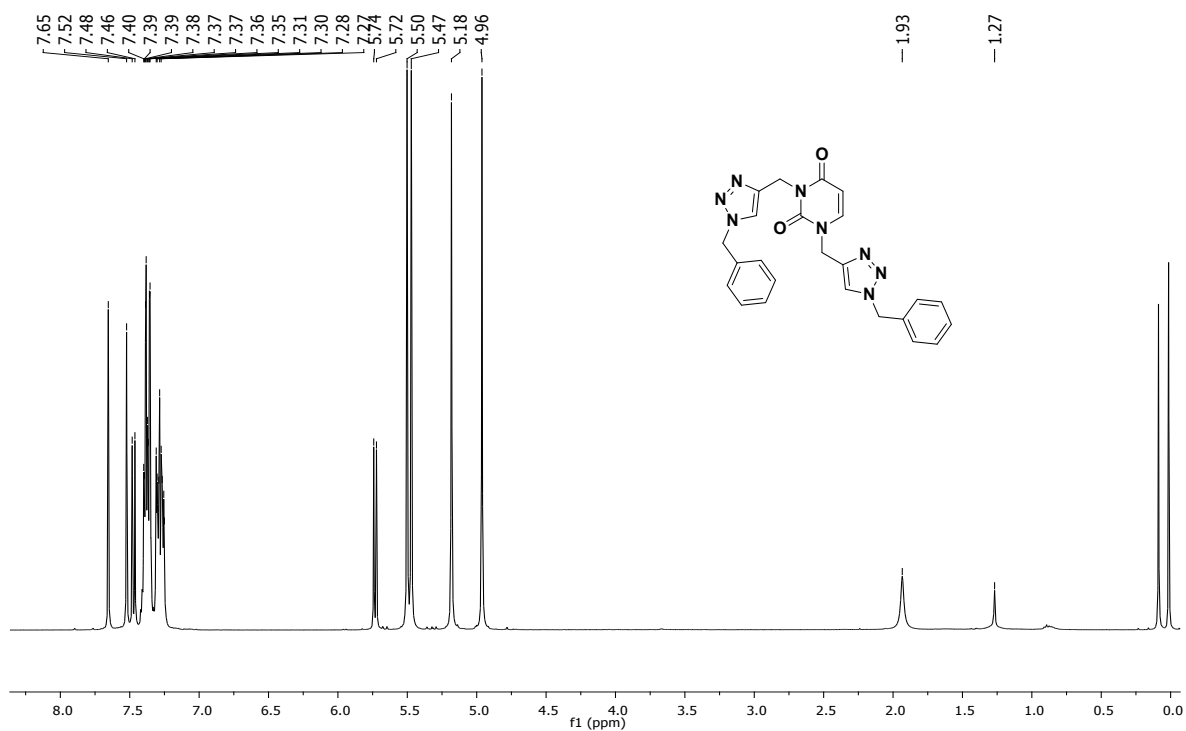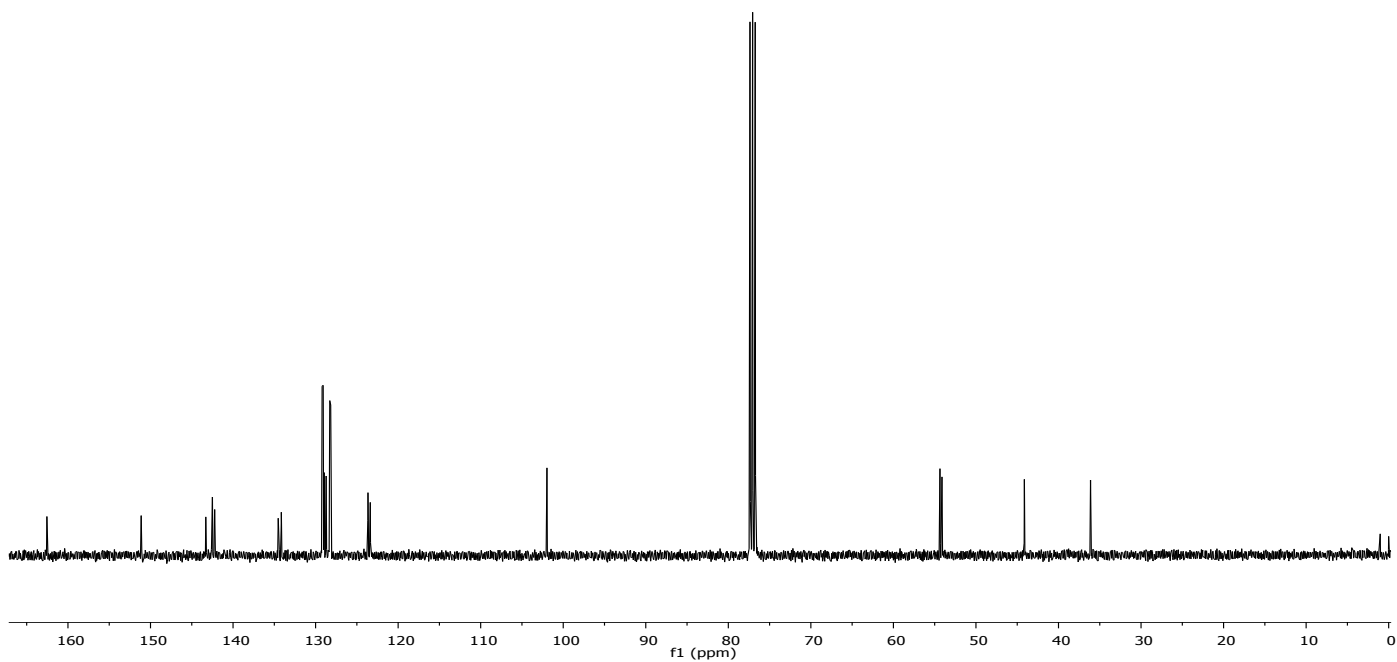



# Supporting Information

## <sup>1</sup>H NMR and <sup>13</sup>C NMR for compound 3g

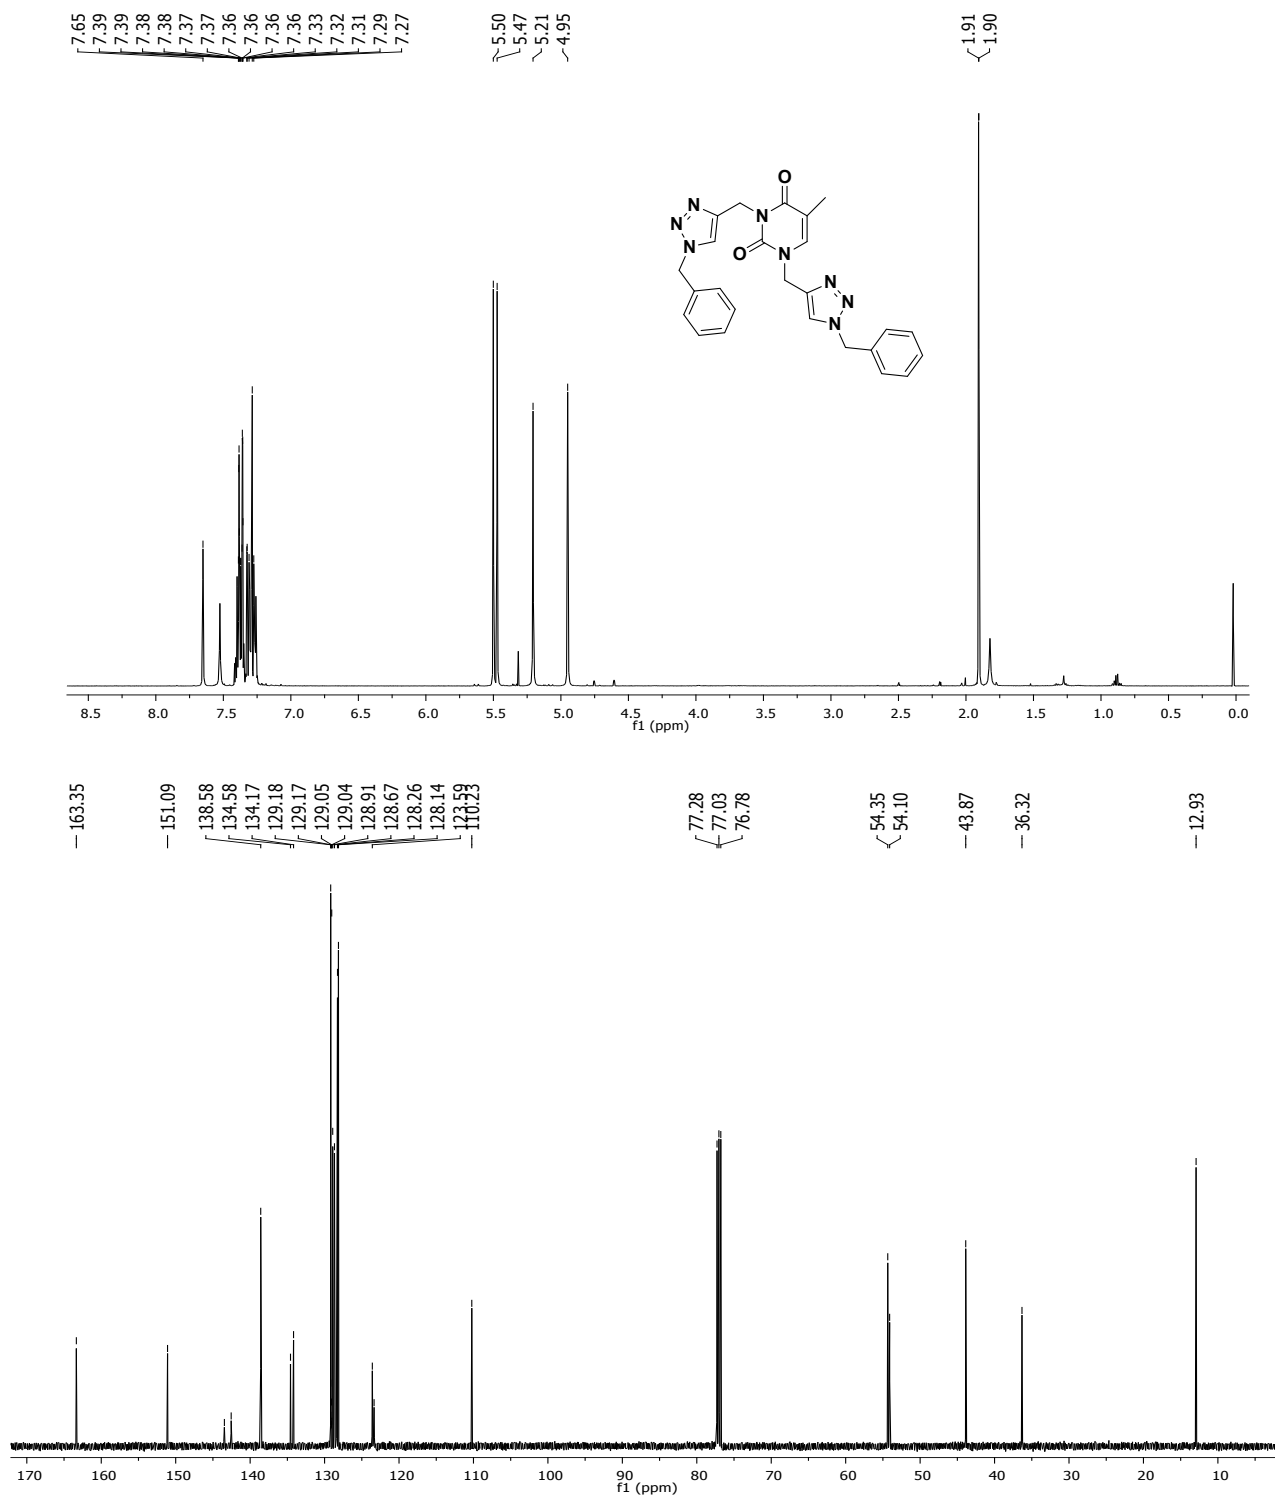

# Supporting Information

## <sup>1</sup>H NMR and <sup>13</sup>C NMR for compound 5a

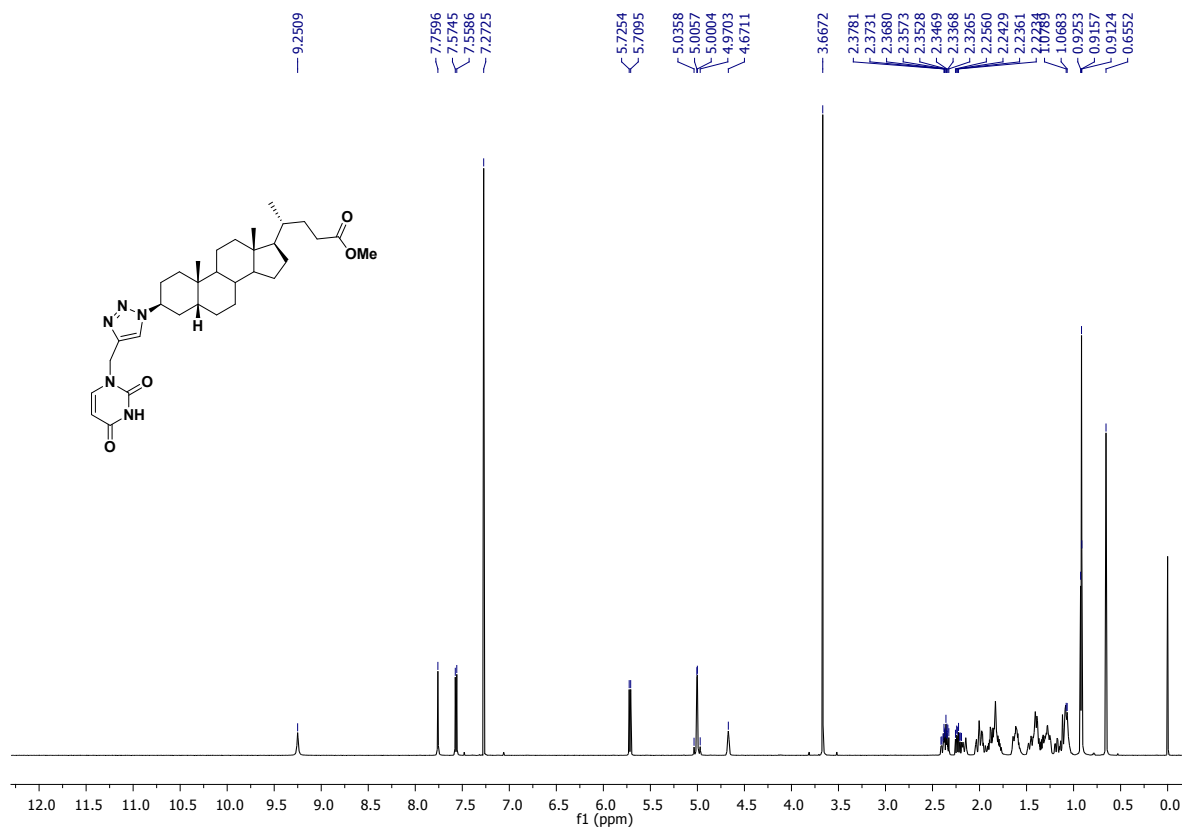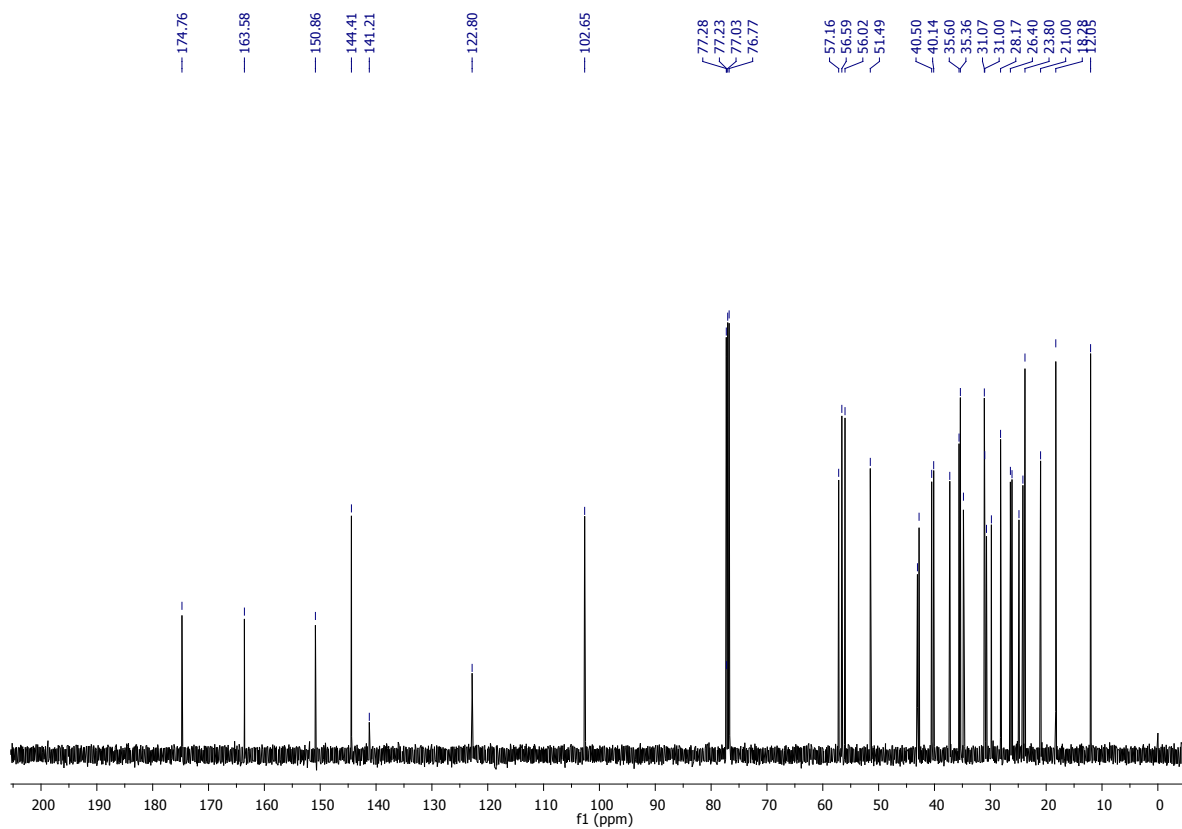

# Supporting Information

## <sup>1</sup>H NMR and <sup>13</sup>C NMR for compound 5b

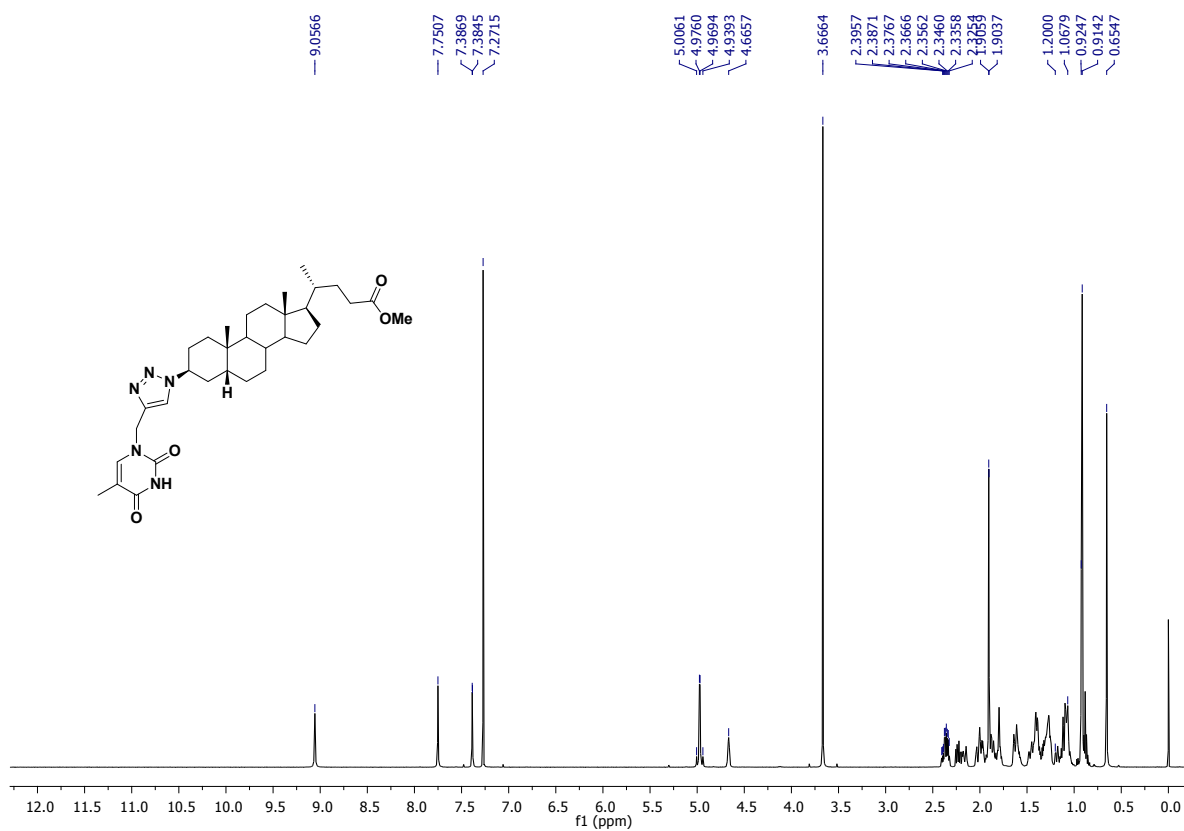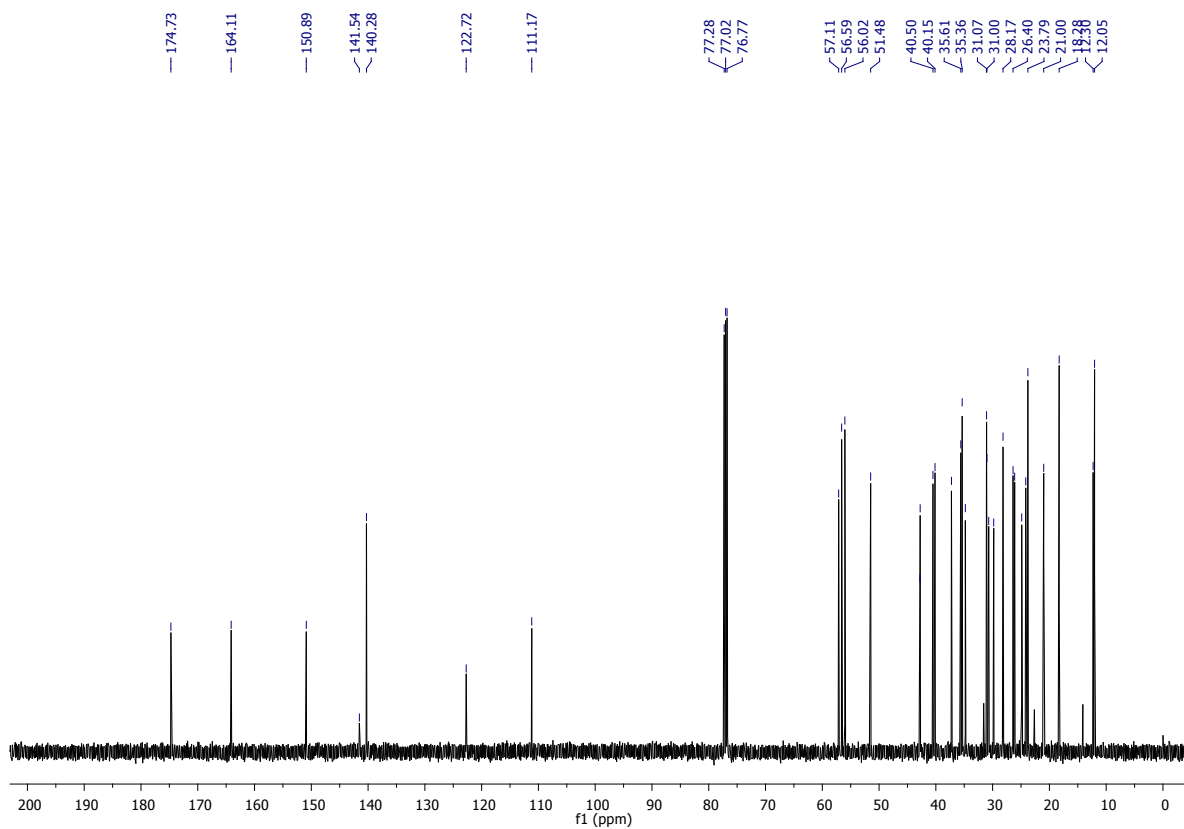

# Supporting Information

## <sup>1</sup>H NMR and <sup>13</sup>C NMR for compound 5c

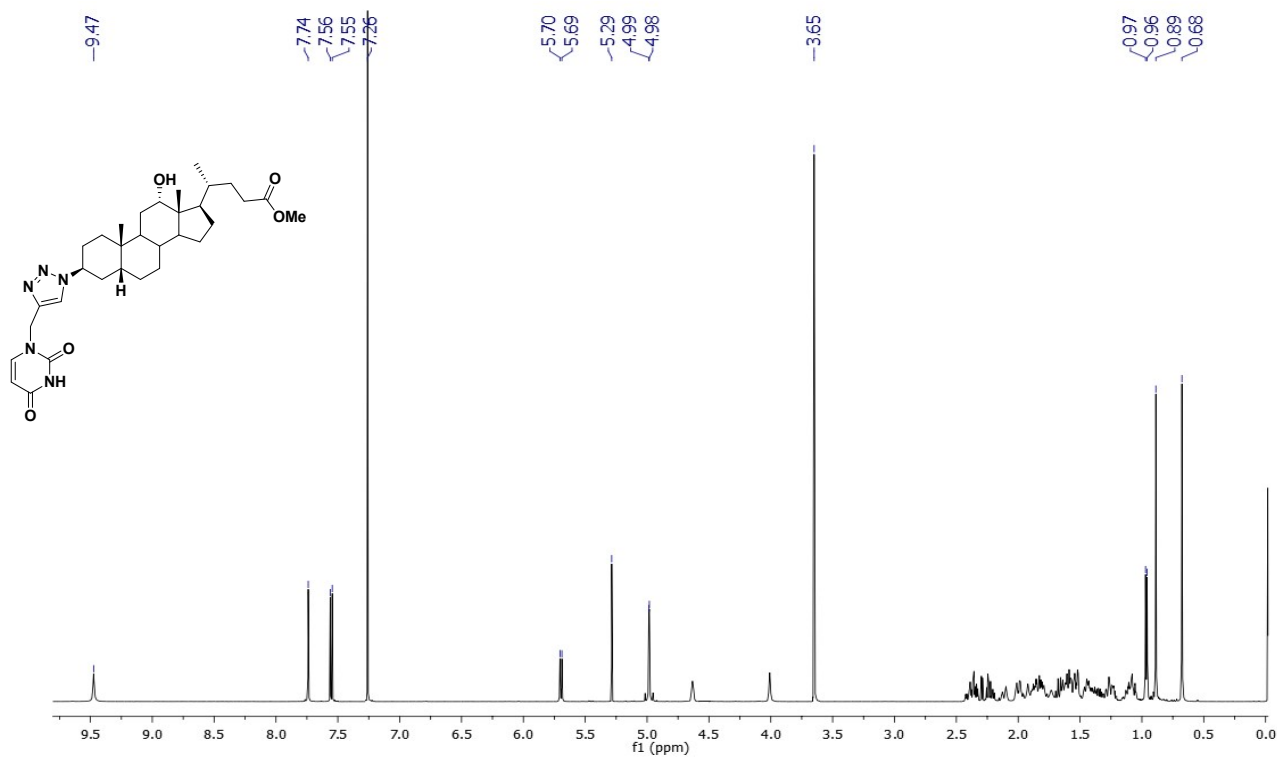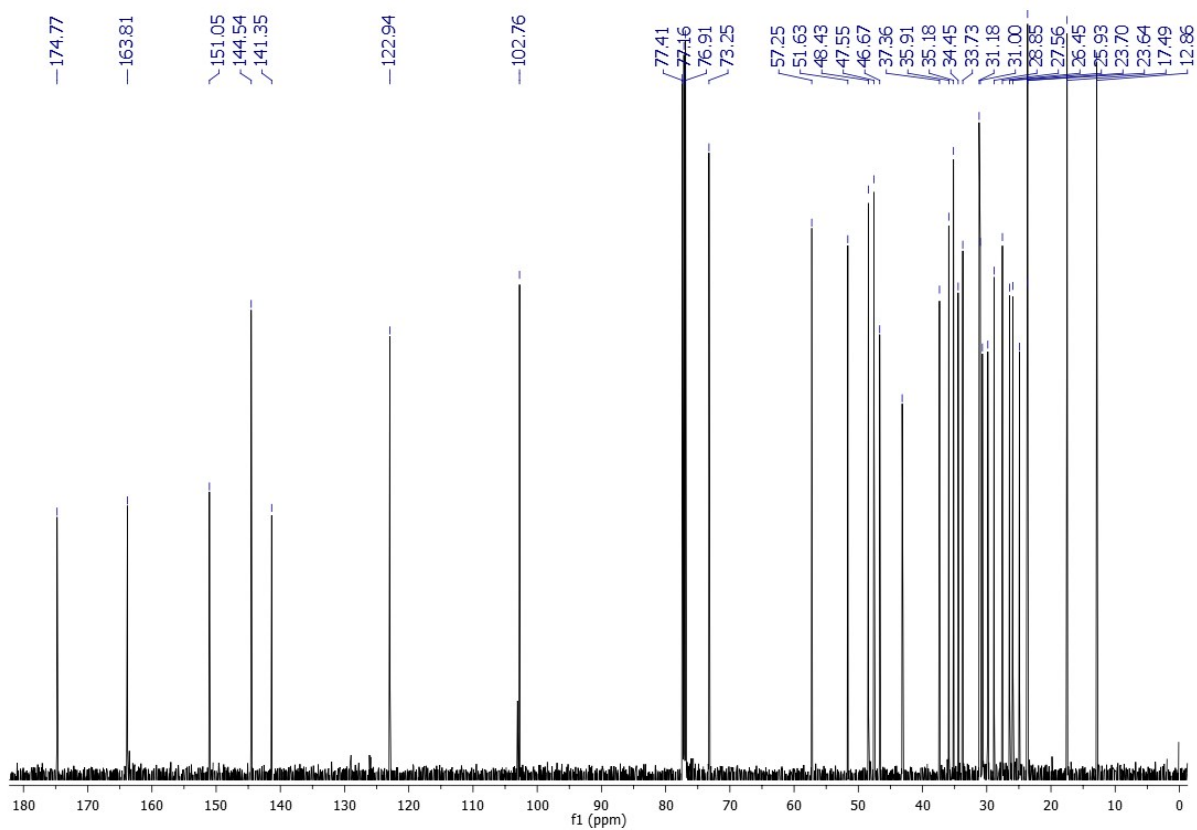

# Supporting Information

## <sup>1</sup>H NMR and <sup>13</sup>C NMR for compound 5d

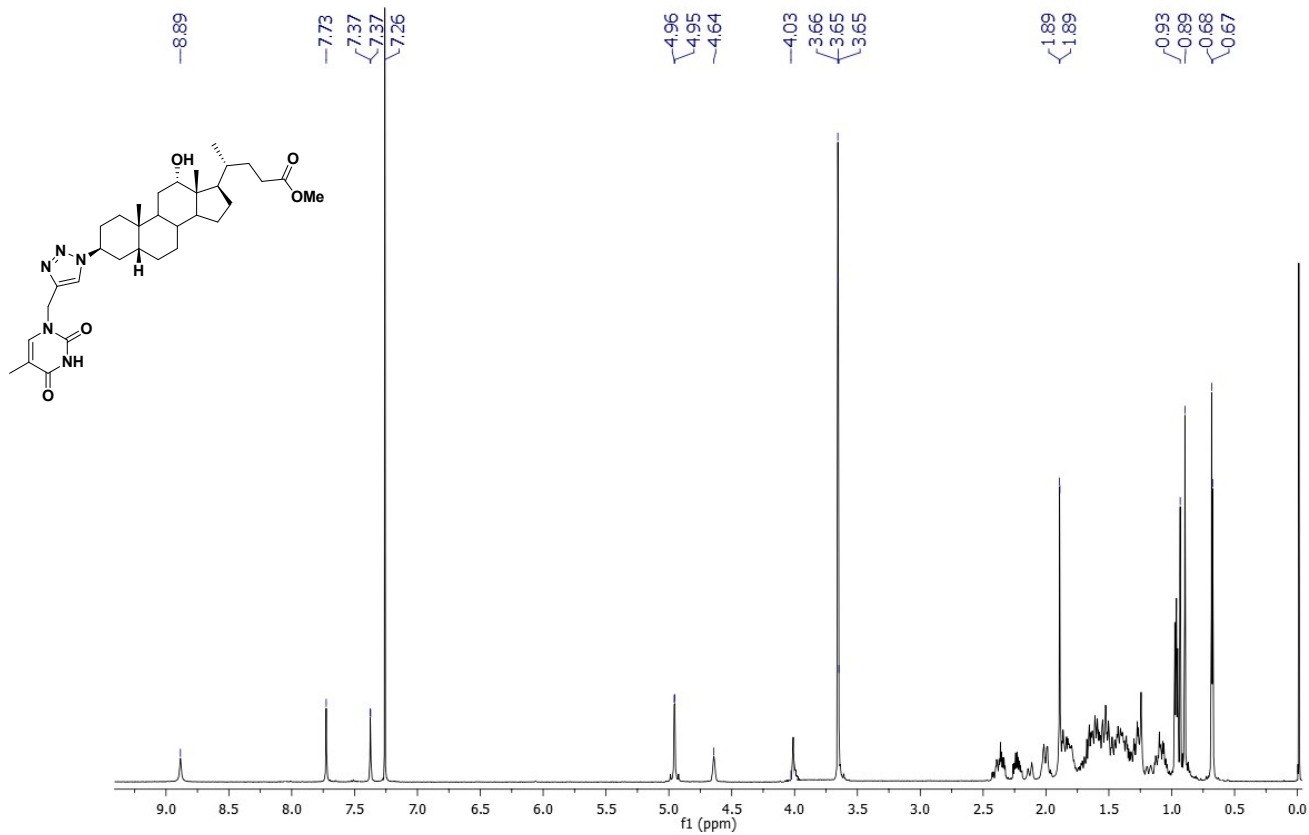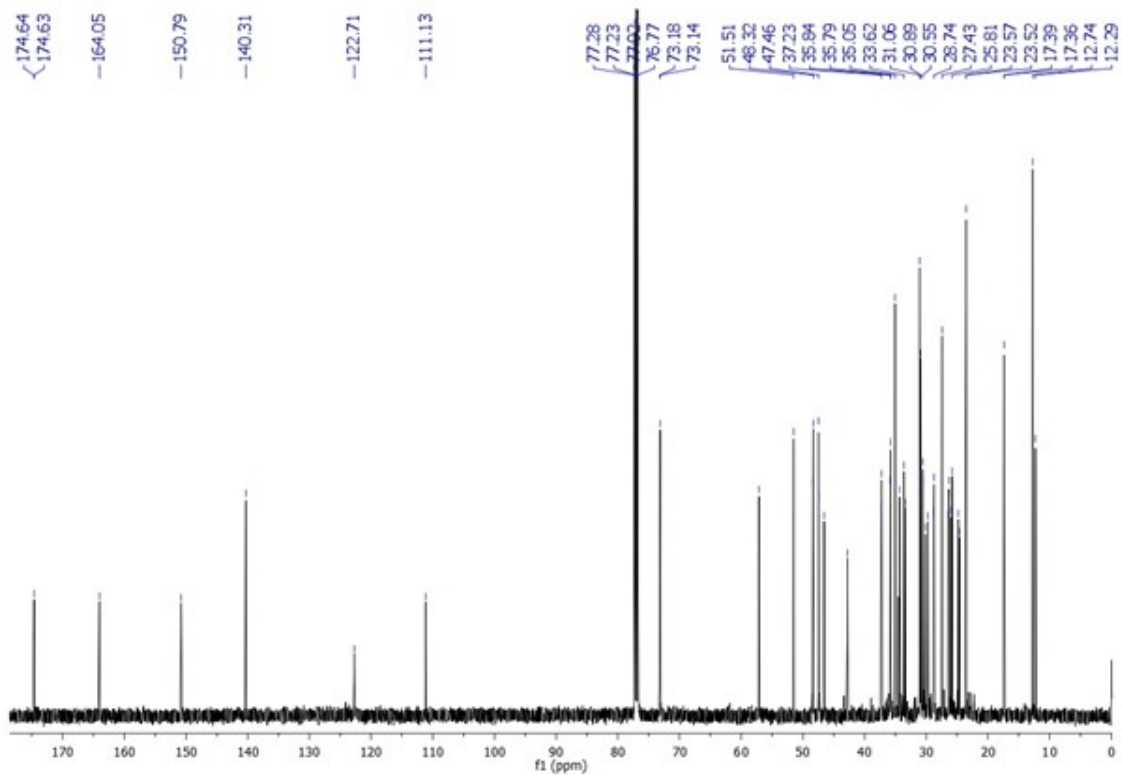

Supporting Information

**<sup>1</sup>H NMR and <sup>13</sup>C NMR for compound 5e**

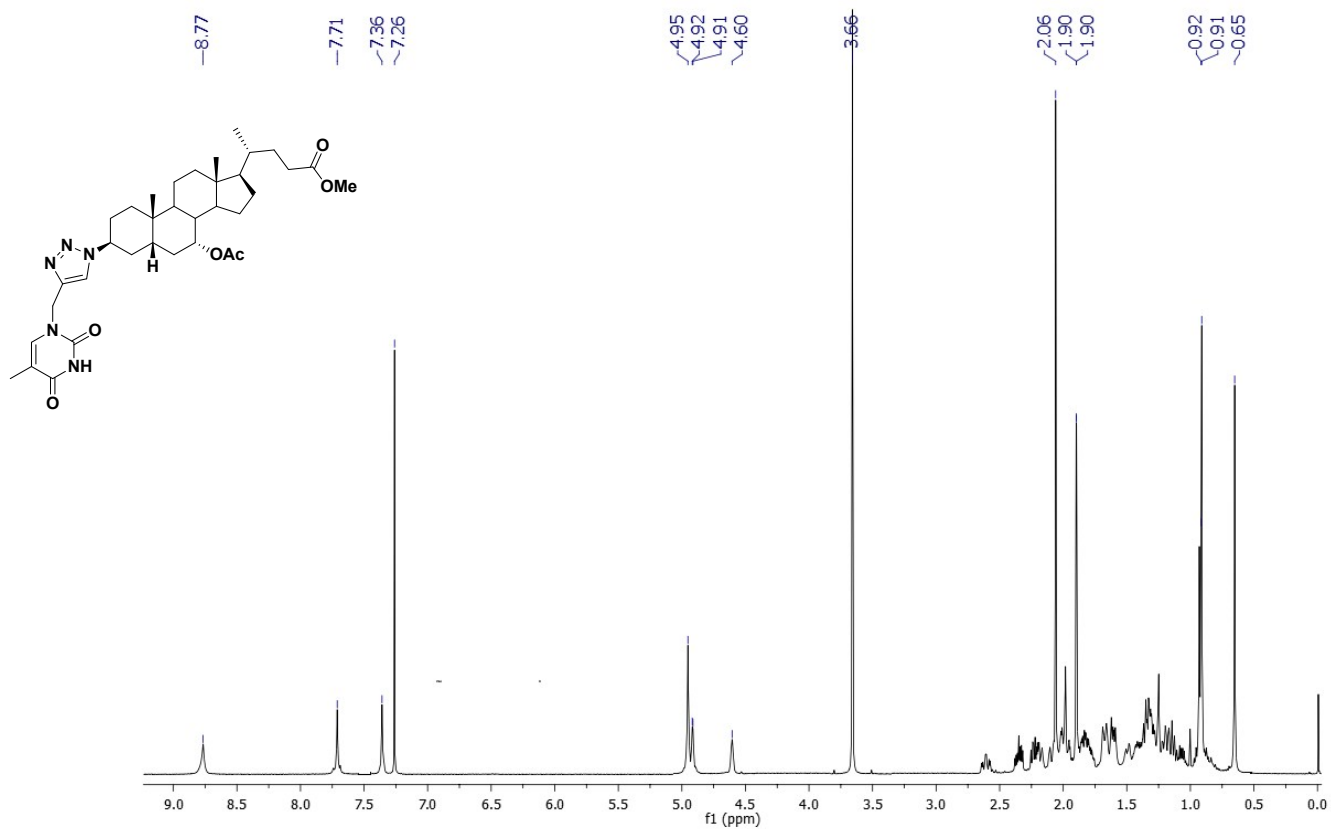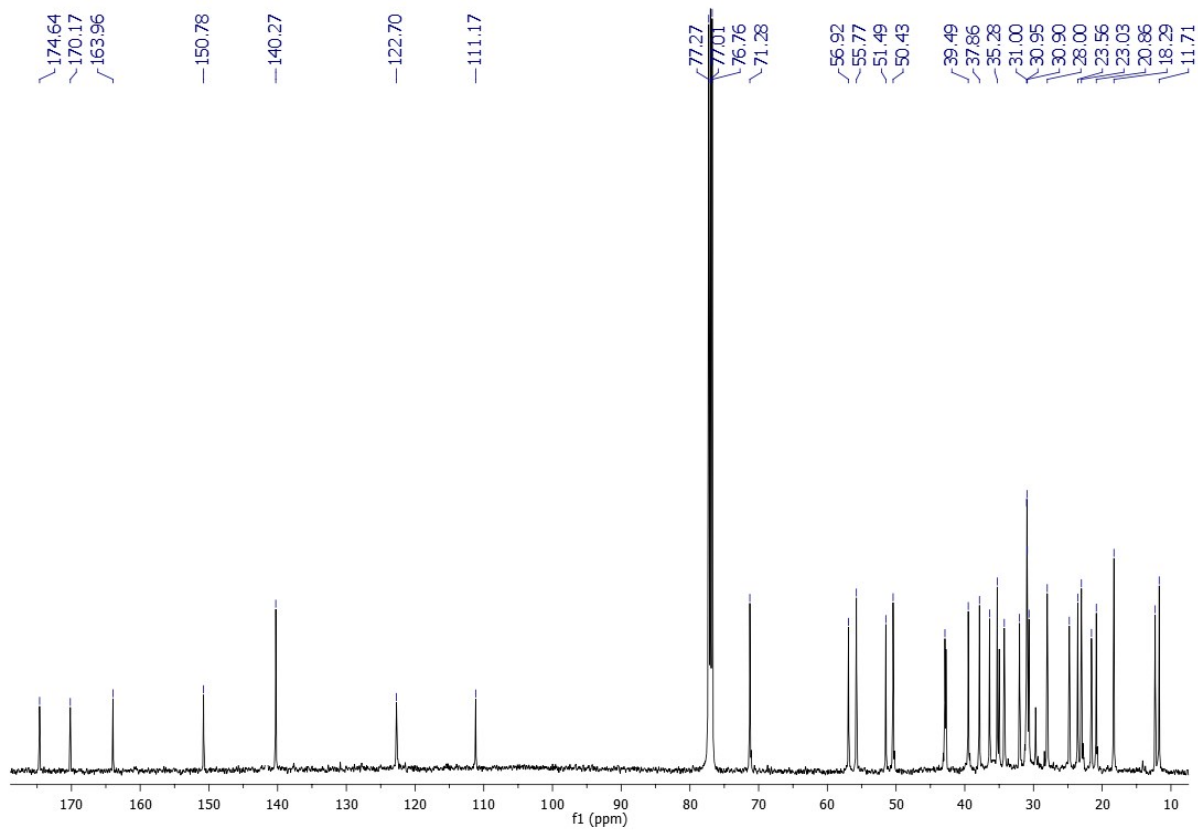

# Supporting Information

## <sup>1</sup>H NMR and <sup>13</sup>C NMR for compound 5f

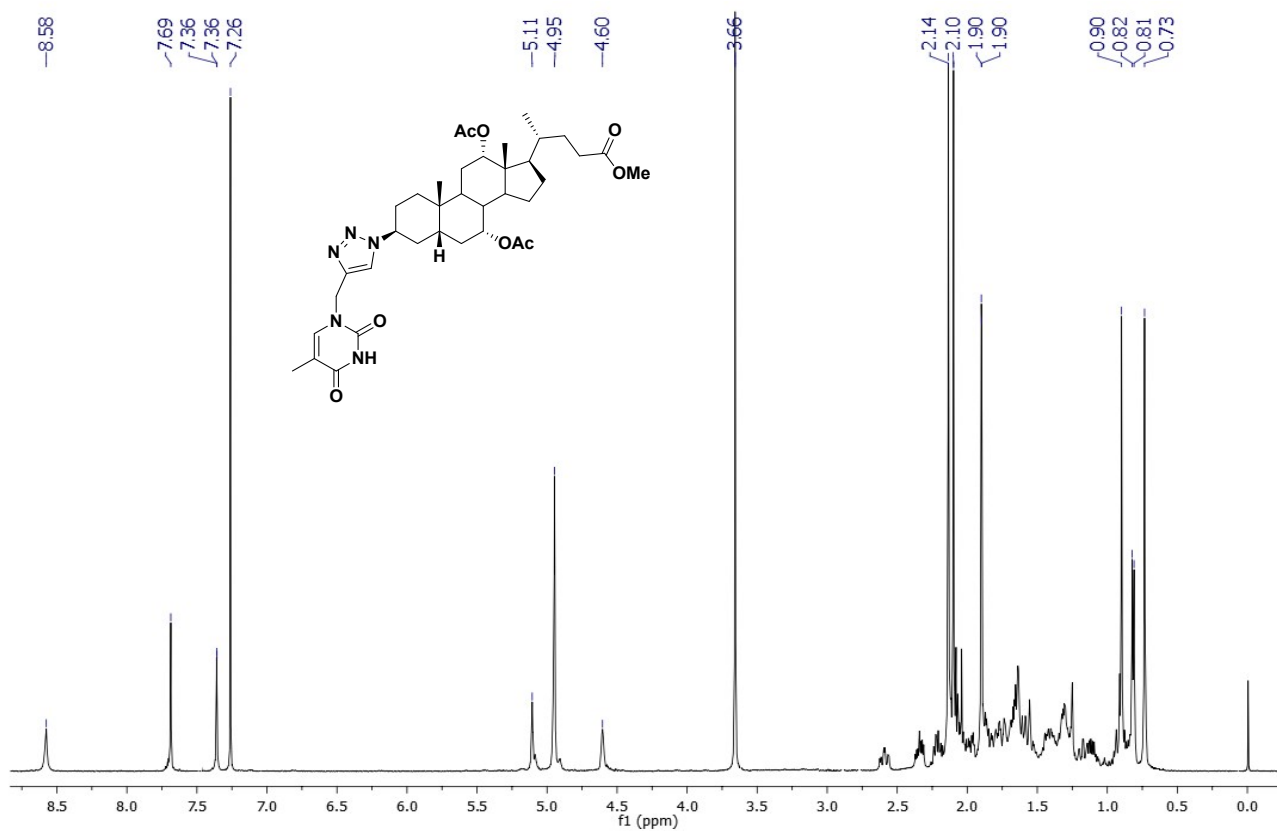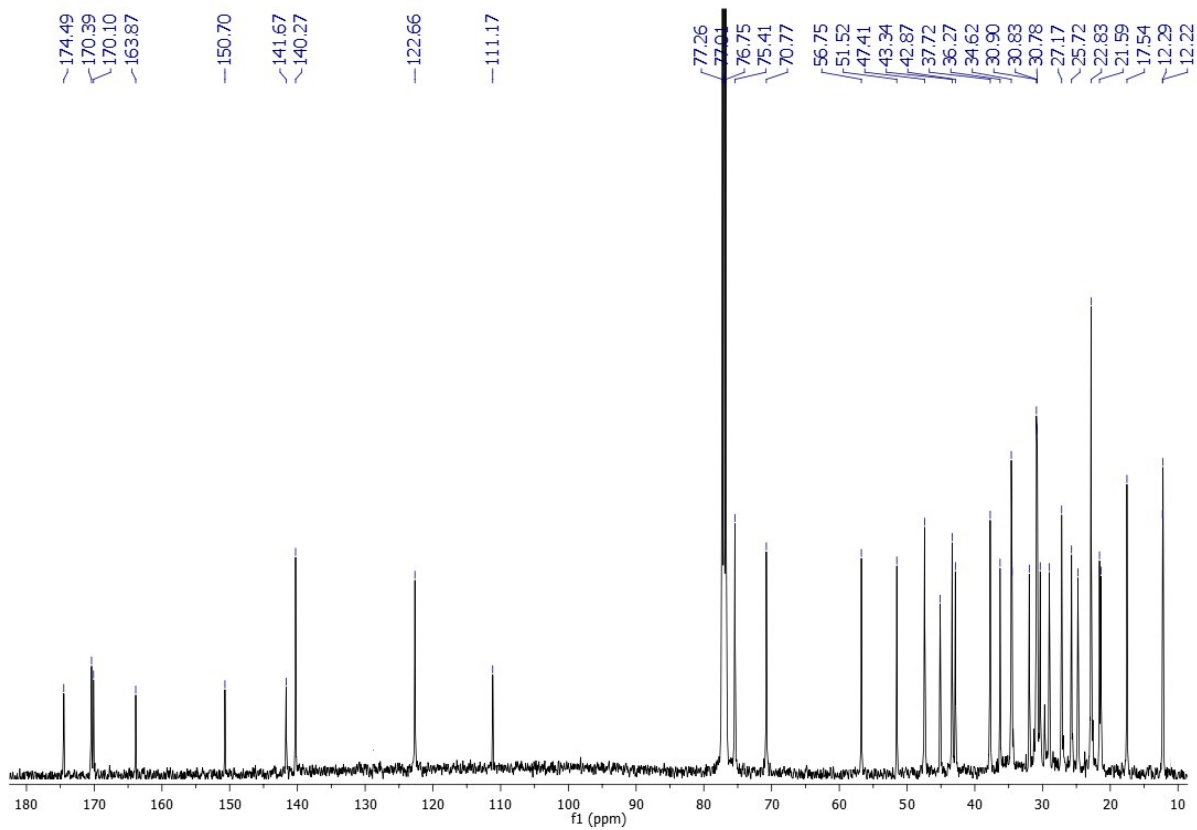

## 5. References

1. G. E. Negrón-Silva, R. González-Olvera, D. Angeles-Beltrán, N. Maldonado-Carmona, A. Espinoza-Vázquez, M. E. Palomar-Pardavé, M. A. Romero-Romo, R. Santillan, *Molecules*, 2013, **18**, 4613.
2. R. González-Olvera, A. Espinoza-Vázquez, G.E. Negrón-Silva, M. E. Palomar-Pardavé, M. A. Romero-Romo, R. Santillan, *Molecules*, 2013, **18**, 15064.
3. J. Zhang, H. Wang, H. Pi, H. Ruan, P. Zhang, J. Wu, *Steroids*, 2009, **74**, 424.
4. V. S. Pore, N. G. Aher, M. Kumar, P.K. Shukla, *Tetrahedron*, 2006, **62**, 11178.
5. P. V. Chavan, K. S. Pandit, U. V. Desai, M. A. Kulkarni, P. P., *RSC Adv.*, 2014, **4**, 42137.
6. Z. Gonda, Z. Novák, *Dalton Trans.*, 2010, **39**, 726.
